# Supplementary material for: Predicting groundwater recharge for varying landcover and climate conditions: – a global meta-study
Source: Copernicus journal article supplement (doi:10.5194/hess-2017-679), 2017-12-20
Supplement: Supplementary file 1 [file Supplement data.xlsx]

## Sheet: Sheet1
Latitude	Longitude	Recharge	Method of estimation	P	T	PET	Rd	S	ksat	SWSC	AI	EW	ρb	Clay	LU	ST	Reference
		(mm/y)		(mm/yr)	(0C)	(mm/yr)	(days/yr)		cm/d	mm		(mm)	(gm/cm3)	(%)
29.4	77.3	205	WTF	668	25.038	1454	33	0.115877	24.7907	133.72	0.14099	210.832	1.53747	21.0375	Cropland	Clay	Ahmed and Umar (2008)
29.4	77.3	280	WTF	668	25.038	1454	33	0.115877	24.7907	133.72	0.192572	210.832	1.53747	21.0375	Cropland	Clay	Ahmed and Umar (2008)
29.4	77.3	300	WTF	668	25.038	1454	33	0.115877	24.7907	133.72	0.206327	210.832	1.53747	21.0375	Cropland	Clay	Ahmed and Umar (2008)
52.3	0.4	83	WTF	474	10.2992	481	157	0.128433	92.6861	920.46	0.172557	251.059	1.42085	27.5325	Cropland	Coarse sand	Andrews et al. (1997)
52.3	0.3	104	WTF	455	10.3391	481	156	0.119371	92.6861	933.72	0.216216	245.974	1.4292	27.8542	Cropland	Loam	Andrews et al. (1997)
-29.8	115.6	35.7	WTF	440	19.2312	1869	88	0.371931	119.265	539.52	0.0191011	47.8253	1.55496	18.1018	Cropland	Coarse sand	Bekele et al. (2006)
-21.47	30.13	132.5	WTF	709	22.8508	1463.37	57	0.83126	43.5893	888.023	0.0905446	16.6242	1.53236	32.0902			Butterworth et al. (1999)
-37.6	140.8	82	WTF	700	14.3732	1151	162	0.208643	119.946	763.29	0.0712424	232.179	1.31898	24.7079	Grassland	Coarse sand	Colville and
-37.7	140.8	5.2	WTF	613	14.3062	1153	167	0.237961	119.946	678.48	0.00450997	247.715	1.17242	21.9625	Grassland	Clay	Crosbie et al. (2007)
-37.8	140.8	48.4	WTF	613	14.2763	1153	169	0.231301	119.946	593.67	0.0419775	0	1.02587	19.2172	Grassland	Clay	Crosbie et al. (2007)
35.6	-98.1	93.8	WTF	743	16.894	1424	80	0.448626	58.5982	728.04	0.0658708	77.1903	1.31845	22.9921	Cropland	Loam	Daniel (1999)
35.6	-98.1	63.9	WTF	743	16.894	1424	80	0.448626	58.5982	728.04	0.0448736	77.1903	1.31845	22.9921	Grassland	Loam	Daniel (1999)
46.1	-89.8	279	WTF	790	4.13645	688	128	0.34042	41.407	807.92	0.405523	240.564	1.37794	16.9624	Grassland	Clay	Dripps and Bradbury (2007)
46.1	-89.8	130	WTF	790	4.13645	688	128	0.34042	41.407	807.92	0.188953	240.564	1.37794	16.9624	Woodland	Clay	Dripps and Bradbury (2007)
46.1	-89.8	176	WTF	790	4.13645	688	128	0.34042	41.407	807.92	0.255814	240.564	1.37794	16.9624	Woodland	Clay	Dripps and Bradbury (2007)
13.4	2.8	35	WTF	567	30.4209	2152	52	0.355003	204.644	624.18	0.0162639	60.7378	1.57382	8.99074	Cropland	Coarse sand	Favreau et al. (2002)
13.6	2.8	25	WTF	557	30.4001	2160	51	0.385007	204.644	626	0.0115741	49.1102	1.5752	8.29827	Cropland	Coarse sand	Favreau et al. (2009)
41.6	-96.6	159	WTF	720	10.0665	1024	102	0.408672	15.9825	599.19	0.155273	118.915	1.44869	32.6389	Cropland	ClayFine sand	Green et al. (2008)
41.6	-96.6	48	WTF	750	10.0665	1024	102	0.408672	15.9825	599.19	0.046875	118.915	1.44869	32.6389	Grassland	Fine sand	Green et al. (2008)
-37.6	140.8	44	WTF	700	14.3732	1151	162	0.208643	119.946	763.29	0.0382276	232.179	1.31898	24.7079	Woodland	Coarse sand	Holmes (1972)
-32.3	18.4	23.5	WTF	196	18.9608	1398	61	1.49624	197.507	327.96	0.0168097	14.732	1.4463	15.97	Scrubland	Coarse sand	Jolly (1992)
13.6	2.6	20	WTF	565	30.4842	2162	51	0.445046	204.644	626	0.00925069	48.2305	1.57508	8.2573	Scrubland	Coarse sand	Leduc et al. (2001)
-32.9	117.6	19	WTF	410	16.7296	1331	102	0.143173	20.7227	524.64	0.014275	58.0692	1.62031	29.469	Cropland	Coarse sand	Loh and Stokes (1981)
-31.8	116.4	30	WTF	590	17.949	1570	99	0.502907	85.8185	501.36	0.0191083	140.469	1.51069	22.7958	Cropland	Coarse sand	Loh and Stokes (1981)
-33.3	116.4	40	WTF	750	16.3822	1423	126	0.33327	146.513	562.04	0.0281096	249.784	1.52677	20.9636	Cropland	Coarse sand	Loh and Stokes (1981)
-33.3	116.6	55	WTF	650	16.4564	1396	123	0.25251	146.513	543	0.0393983	203.163	1.56697	22.2852	Cropland	Coarse sand	Loh and Stokes (1981)
-33.3	116.4	60	WTF	725	16.3822	1423	126	0.33327	146.513	562.04	0.0421644	249.784	1.52677	20.9636	Cropland	Coarse sand	Loh and Stokes (1981)
-33.4	115.9	100	WTF	1150	16.9204	1504	132	0.407302	124.171	719.92	0.0664894	288.106	1.43907	20.2603	Cropland	Coarse sand	Loh and Stokes (1981)
-31.8	116.4	24	WTF	590	17.949	1570	99	0.502907	85.8185	501.36	0.0152866	140.469	1.51069	22.7958	Grassland	Clay	Loh and Stokes (1981)
-33.4	115.9	10	WTF	1250	16.9204	1504	132	0.407302	124.171	719.92	0.00664894	288.106	1.43907	20.2603	Woodland	Coarse sand	Loh and Stokes (1981)
17.4	78.4	114	WTF	613	27.746	1704	51	0.533353	15.2611	543.52	0.0669014	255.53	1.49541	37.2823	Cropland	Clay	Maréchal et al. (2006)
49.9	-112.8	34.7	WTF	400	5.67497	851	82	0.461459	25.5195	885.72	0.470035	28.7273	1.26593	24.278	Cropland	Loam	Rodvang et al. (2004)
49.9	-112.8	59.7	WTF	400	5.67497	851	82	0.461459	25.5195	885.72	0.470035	28.7273	1.26593	24.278	Cropland	Coarse sand	Rodvang et al. (2004)
32.71	-102.14	20.5	WTF	519.1	18.1536	1777.68	56	0.213014	42.4297	652.017	0.232072	6.76074	1.51756	17.159			Scanlon et al. 2005
-19.08	14.58	747.1	WTF	400	19.4551	1327.68	46	1.00327	31.4965	216.825	0.301278	6.86487	1.65784	22.8106			Selaolo et al. (1996)
23.1	73.3	71	WTF	835	28.038	1734	33	0.251641	13.8094	742.84	0.481546	410.259	1.5872	39.3417	Cropland	Clay	Sharda et al. (2006)
-18.53	27.55	26	WTF	555	23.1775	2000	69	0.517154	107.95	808.969	0.2775	133.422	1.56623	24.8412			Sibanda et al. (2009)
38.24	-98.58	56	WTF	831.3	13.6789	1360.89	86	0.162753	30.8545	570.09	0.498262	39.705	1.34102	26.5289			Sophocleous 1992
-33.92	150.92	195.7	WTF	738	17.521	1071.72	125	0.670112	21.3272	323.675	0.688615	0	1.19666	25.2426			Sun and Cornish (2005)
-37.8	140.8	63	T	686	14.2763	1132	169	0.231301	119.946	593.67	0.606007	0	1.02587	19.2172	Grassland	Coarse sand	Allison and Hughes (1972)
-37.8	140.8	13	T	686	14.2763	1132	169	0.231301	119.946	593.67	0.606007	0	1.02587	19.2172	Woodland	Coarse sand	Allison and Hughes (1972)
-37.8	140.8	106	T	700	14.2763	1132	169	0.231301	119.946	593.67	0.618375	0	1.02587	19.2172	Grassland	Coarse sand	Allison and Hughes (1978)
-37.8	140.8	114	T	700	14.2763	1132	169	0.231301	119.946	593.67	0.618375	0	1.02587	19.2172	Grassland	Coarse sand	Allison and Hughes (1978)
-35.1	142.1	305	T	335	17.1331	1379	74	0.057163	28.1593	238.72	0.24293	9.18041	1.52875	19.8093	Cropland	Coarse sand	Allison and Hughes (1983)
-35.1	142.1	0.07	T	335	17.1331	1379	74	0.057163	28.1593	238.72	0.24293	9.18041	1.52875	19.8093	Woodland	Coarse sand	Allison and Hughes (1983)
-34.3	139.6	0.135	T	300	17.1632	1374	83	0.220713	22.0447	144.48	0.218341	11.3024	1.54793	22.0361	Woodland	Coarse sand	Allison et al. (1985)
-34.3	140.8	2	T	500	17.7035	1245	68	0.121951	26.4657	411.36	0.401606	2.07832	1.54789	21.353	Cropland	Clay	Allison et al. (1990)
-34.3	140.8	2	T	500	17.7035	1245	68	0.121951	26.4657	411.36	0.401606	2.07832	1.54789	21.353	Cropland	Clay	Allison et al. (1990)
-34.3	139.6	12	T	300	17.1632	1374	83	0.220713	22.0447	144.48	0.218341	11.3024	1.54793	22.0361	Cropland	Coarse sand	Allison et al. (1990)
-35.1	140.3	25.2	T	370	16.7466	1346	93	0.113436	46.4103	288.48	0.274889	20.5963	1.52487	19.9815	Cropland	Clay	Allison et al. (1990)
-34.3	139.6	0.05	T	300	17.1632	1374	83	0.220713	22.0447	144.48	0.218341	11.3024	1.54793	22.0361	Woodland	Coarse sand	Allison et al. (1990)
-35.1	140.1	0.05	T	340	16.7142	1334	94	0.103295	46.4103	241.36	0.254873	22.9971	1.52806	20.5647	Woodland	Coarse sand	Allison et al. (1990)
-35.1	141.9	0.06	T	340	17.0785	1373	76	0.059607	41.5543	196.88	0.247633	9.07256	1.52671	19.5999	Woodland	Coarse sand	Allison et al. (1990)
-35.1	140.3	0.07	T	370	16.7466	1346	93	0.113436	46.4103	288.48	0.274889	20.5963	1.52487	19.9815	Woodland	Coarse sand	Allison et al. (1990)
-34.4	140.1	1.3	T	270	17.4106	1361	75	0.122545	26.4657	400.24	0.198384	4.46485	1.5492	21.8282	Woodland	Coarse sand	Allison et al. (1990)
25.8	42.9	1.8	T	133	25.9114	2283	23	0.600362	24.4265	2	0.0582567	0	1.4875	19.0727	No vegetation	Coarse sand	Al-Sagaby and Moallim (2001)
29.8	35.3	0.03	T	65	20.3266	1768	18	3.88391	52.292	2.14	0.0367647	0	1.47568	21.2919	No vegetation	Coarse sand	Amro et al. (2001)
32.1	36.1	0.2	T	67	18.4716	1504	46	1.75474	25.5795	693.8	0.0445479	39.5962	1.50307	28.7981	No vegetation	ClayLoam	Amro et al. (2001)
32.1	36.1	1.5	T	67	18.4716	1504	46	1.75474	25.5795	693.8	0.0445479	39.5962	1.50307	28.7981	No vegetation	ClayLoam	Amro et al. (2001)
32.3	35.9	8	T	480	18.6639	1447	53	2.97204	15.9991	765.4	0.331721	96.3272	1.51398	31.8439	No vegetation	Coarse sand	Amro et al. (2001)
32.3	35.9	28	T	480	18.6639	1447	53	2.97204	15.9991	765.4	0.331721	96.3272	1.51398	31.8439	No vegetation	Coarse sand	Amro et al. (2001)
35	-106.75	8.7	T	358.9	11.4409	1445.56	62	1.0623	41.6265	508.625	0.259484	9.83529	1.54752	19.6045			Anderholm 2001
46.98	9.69	126	T	484	4.5028	12	199	10.1552	36.553	715.822	40.3333	1301.66	1.32277	24.9346			Andreo et al.(2008)
13.01	78.33	23.5	T	555	26.5308	2000	52	1.02992	13.344	481.43	0.2775	167.82	1.553	40.8948			Anurag et al. (2006)
32.98	-80.03	156	T	944	19.08	902.097	111	0.0651047	0	424.992	1.04645	0	0.693483	15.4491			Arnold et al. (2000)
39.7	-91.1195	151	T	1009	12.2714	1030.4	118	0.474841	11.6536	1050.02	0.979231	261.101	1.54089	29.8637			Arnold et al. (2000)
40	-90.09	120	T	822	11.8357	999.547	120	0.237592	10.7248	1005.47	0.822372	259.188	1.53306	31.0395			Arnold et al. (2000)
16.9	78.6	67	T	1100	28.1129	1669	46	0.625016	15.5431	517	0.659077	181.026	1.48646	36.981	Cropland	Clay	Athavale et al. (1980)
16.9	78.6	73	T	1150	28.1129	1669	46	0.625016	15.5431	517	0.689035	181.026	1.48646	36.981	Cropland	Clay	Athavale et al. (1980)
16.9	78.6	80	T	970	28.1129	1669	46	0.625016	15.5431	517	0.581186	181.026	1.48646	36.981	Cropland	Clay	Athavale et al. (1980)
16.9	78.6	83	T	1310	28.1129	1669	46	0.625016	15.5431	517	0.784901	181.026	1.48646	36.981	Cropland	Clay	Athavale et al. (1980)
16.9	78.6	83	T	1150	28.1129	1669	46	0.625016	15.5431	517	0.689035	181.026	1.48646	36.981	Cropland	Clay	Athavale et al. (1980)
16.9	78.6	96.8	T	1310	28.1129	1669	46	0.625016	15.5431	517	0.784901	181.026	1.48646	36.981	Cropland	Clay	Athavale et al. (1980)
16.9	78.6	98	T	1200	28.1129	1669	46	0.625016	15.5431	517	0.718993	181.026	1.48646	36.981	Cropland	Clay	Athavale et al. (1980)
16.9	78.6	133	T	1310	28.1129	1669	46	0.625016	15.5431	517	0.784901	181.026	1.48646	36.981	Cropland	Clay	Athavale et al. (1980)
16.9	78.6	222	T	1430	28.1129	1669	46	0.625016	15.5431	517	0.8568	181.026	1.48646	36.981	Cropland	Clay	Athavale et al. (1980)
31.5	34.47	117.935	T	321	21.2258	1078.6	47	0.4415	31.4336	597.52	0.297609	0	1.4389	28.8136			Baalousha (2005)
19	42	6.1	T	63.9	24.0622	1917.84	33	4.5459	34.5402	13.5	0.0925908	0	1.46355	21.3106			Bazuhair & Wood 1996
19.09	42.86	8	T	169.6	21.9176	1853.36	41	1.19709	29.192	13.3816	0.117415	0	1.46557	21.1139			Bazuhair and wood, 1996
-22.1	26.3	12.5	T	500	22.1382	1408	50	0.198002	140.15	609	0.355114	16.3151	1.5708	21.5146	Scrubland	Coarse sand	Beekman et al. (1996)
-29.8	115.6	14.7	T	440	19.2312	1869	88	0.371931	119.265	539.52	0.23542	47.8253	1.55496	18.1018	Cropland	Coarse sand	Bekele et al. (2006)
-29.8	115.6	16.2	T	440	19.2312	1612	88	0.371931	119.265	539.52	0.272953	47.8253	1.55496	18.1018	Grassland	Coarse sand	Bekele et al. (2006)
-29.8	115.6	35.9	T	440	19.2312	1612	88	0.371931	119.265	539.52	0.272953	47.8253	1.55496	18.1018	Grassland	Coarse sand	Bekele et al. (2006)
-29.8	115.6	9	T	440	19.2312	1869	88	0.371931	119.265	539.52	0.23542	47.8253	1.55496	18.1018	Scrubland	Coarse sand	Bekele et al. (2006)
14.0726	9.47021	20.5	T	298.4	29.0989	2391.47	35	0.26688	252.697	704.364	0.148862	14.5175	1.56783	9.31449			Bromley et al. (1997)
-27.1	22.8	1.8	T	337	20.6351	1572	44	0.587178	210.971	609	0.214377	4.40782	1.61525	13.419	Grassland	Coarse sand	Butler and Verhagen (2001)
-27.1	22.8	13	T	337	20.6351	1572	44	0.587178	210.971	609	0.214377	4.40782	1.61525	13.419	Grassland	Coarse sand	Butler and Verhagen (2001)
53.3	-1.1	30	T	643	9.72518	449	179	0.361975	29.4384	1030.96	1.43207	342.671	1.48721	29.8711	Woodland	Coarse sand	Calder et al. (2003)
13.54	77.66	66.1	T	968	26.129	1704.7	50	0.844113	13.577	457.864	0.56784	150.167	1.55067	41.7968			Chand et al. (2004)
35	-79	4.5	T	1218	16.8157	1139.25	112	0.249875	36.3308	622.25	1.06912	301.049	1.4285	30.8313			Coes et al. (2006)
-32.4	18.8	15	T	275	18.9859	1440	63	3.88503	197.507	321.66	0.190972	39.7092	1.58854	19.0776	Cropland	Coarse sand	Conrad et al. (2005)
-32.4	18.8	2	T	200	18.9859	1440	63	3.88503	197.507	321.66	0.138889	39.7092	1.58854	19.0776	Scrubland	Coarse sand	Conrad et al. (2005)
-35.1	140.1	9.8	T	340	16.7142	1335	94	0.103295	46.4103	241.36	0.254682	22.9971	1.52806	20.5647	Cropland	Fine sand	Cook (1992)
-35.08	150.69	25.5	T	340	16.8075	1800	132	0.576846	0	133.699	0.188889	0	0.495161	10.7383			Cook and Kilty (1992)
-34.6	142.8	7	T	312	17.6823	1421	65	0.057296	19.767	702.67	0.219564	5.56924	1.5809	25.8726	Cropland	Clay	Cook et al. (1989)
-34.6	143.6	8.3	T	322	17.7151	1378	61	0.011216	13.4273	870.22	0.233672	5.92432	1.6468	34.2541	Cropland	Clay	Cook et al. (1989)
-35.1	140.1	17.4	T	340	16.7142	1335	94	0.103295	46.4103	241.36	0.254682	22.9971	1.52806	20.5647	Grassland	Coarse sand	Cook et al. (1989)
-35.1	140.1	0.05	T	340	16.7142	1335	94	0.103295	46.4103	241.36	0.254682	22.9971	1.52806	20.5647	Woodland	Coarse sand	Cook et al. (1989)
-34.4	140.1	3	T	270	17.4106	1361	75	0.122545	26.4657	400.24	0.198384	4.46485	1.5492	21.8282	Cropland	Clay	Cook et al. (1992)
15.6	-16.3	15	T	356	27.3102	1853	60	0.051475	206.939	573.08	0.192121	0	1.43932	10.5731	Cropland	Coarse sand	Cook et al. (1992)
-34.3	139.6	11	T	340	17.1632	1374	83	0.220713	22.0447	144.48	0.247453	11.3024	1.54793	22.0361	Grassland	Coarse sand	Cook et al. (1994)
-35.1	140.1	13	T	340	16.7142	1335	94	0.103295	46.4103	241.36	0.254682	22.9971	1.52806	20.5647	Grassland	Coarse sand	Cook et al. (1994)
-35.1	140.1	16	T	340	16.7142	1335	94	0.103295	46.4103	241.36	0.254682	22.9971	1.52806	20.5647	Grassland	Coarse sand	Cook et al. (1994)
-35.1	140.1	0.1	T	260	16.7142	1335	94	0.103295	46.4103	241.36	0.194757	22.9971	1.52806	20.5647	Woodland	Coarse sand	Cook et al. (1994)
-35.1	140.1	0.9	T	260	16.7142	1335	94	0.103295	46.4103	241.36	0.194757	22.9971	1.52806	20.5647	Woodland	Coarse sand	Cook et al. (1994)
-12.6	131.1	200	T	1720	27.9854	1931	105	0.141851	41.1888	347.4	0.89073	0	0.969976	23.178	Woodland	Clay	Cook et al. (1998)
-34.3	140.6	2.7	T	260	17.65	1373	68	0.127147	26.4657	500.32	0.189366	2.38229	1.54592	21.1204	Grassland	Coarse sand	Cook et al. (2004)
-34.3	140.6	0.1	T	260	17.65	1373	68	0.127147	26.4657	500.32	0.189366	2.38229	1.54592	21.1204	Woodland	Coarse sand	Cook et al. (2004)
-33.41	149.49	25	T	457	13.6792	1443	102	1.42801	27.2207	1019.15	0.316701	241.326	1.47516	33.3413			Crosbie et al.(2010)
23.6	73.3	34	T	852	27.3847	1724	31	0.487768	13.8094	747.56	0.4942	385.583	1.58103	38.9279	Cropland	Clay	Datta et al. (1980)
23.1	72.6	35.6	T	648	28.2797	1718	30	0.110823	30.2946	695.38	0.377183	331.978	1.51729	26.6547	Cropland	Clay	Datta et al. (1980)
23.1	72.6	58.5	T	1014	28.2797	1718	30	0.110823	30.2946	695.38	0.590221	331.978	1.51729	26.6547	Cropland	Clay	Datta et al. (1980)
23.4	72.4	70.9	T	1357	28.1278	1754	25	0.135708	30.2946	609.82	0.77366	274.897	1.49462	24.499	Cropland	Clay	Datta et al. (1980)
23.8	73.1	87	T	1145	27.0718	1758	30	0.681907	13.8094	627.16	0.651308	348.872	1.55061	33.5115	Cropland	Clay	Datta et al. (1980)
23.4	72.4	144	T	1682	28.1278	1754	25	0.135708	30.2946	609.82	0.958951	274.897	1.49462	24.499	Cropland	Clay	Datta et al. (1980)
23.1	73.1	184	T	1411	28.1315	1731	32	0.199278	13.8094	729.28	0.815136	395.739	1.56723	35.7169	Cropland	Clay	Datta et al. (1980)
30.87	-98.45	3.5	T	834.7	19.1119	1421.07	76	0.778059	15.7993	693.838	0.525136	85.6342	1.3525	27.9226			Davidson, 1979
-24.8	25.3	0.9	T	325	21.3495	1376	55	0.773852	130.028	688.2	0.236192	13.0829	1.55758	21.0578	Scrubland	Coarse sand	De Vries et al. (2000)
-24.8	25.3	1	T	350	21.3495	1376	55	0.773852	130.028	688.2	0.25436	13.0829	1.55758	21.0578	Scrubland	Coarse sand	De Vries et al. (2000)
-24.1	25.3	3	T	420	21.9191	1372	53	0.346164	130.028	604.12	0.306122	8.37521	1.57736	18.6919	Scrubland	Coarse sand	De Vries et al. (2000)
-23.8	25.1	5	T	450	22.2227	1396	52	0.192929	209.019	528.82	0.32235	6.80453	1.60623	16.1286	Scrubland	Coarse sand	De Vries et al. (2000)
15.6	-16.3	15	T	356	27.3102	1853	60	0.051475	206.939	573.08	0.192121	0	1.43932	10.5731	Cropland	Coarse sand	Deans et al. (2005)
24.65	46.7333	20	T	163.6	26.5932	2180.52	32	0.712156	37.0649	3	0.0481363	0	1.49719	19.9425			Dincer et al. 1974
51.9	-107.3	3	T	321	2.95414	719	77	0.227762	19.4396	650.4	0.446453	39.1399	1.29206	24.6511	Cropland	ClayFine sand	Dyck et al. (2003)
40.67	-117.67	14	T	248.1	9.61964	1361.67	73	3.90511	26.8214	156.501	0.168814	14.8463	1.4782	20.2784			Ealdn et al. , 1976
35.003	9.50317	1.3	T	231	18.9454	1425.07	53	1.38878	25.2521	382.008	0.240413	31.2249	1.42807	24.4489			Edmunds (2001)
34.8	32.9	52.5	T	420	18.9002	1364	68	2.81612	0	257.04	0.307918	162.756	0	0	Grassland	Coarse sand	Edmunds (2001)
34.8	32.9	55.5	T	420	18.9002	1364	68	2.81612	0	257.04	0.307918	162.756	0	0	Grassland	Coarse sand	Edmunds (2001)
32.2806	35.8953	28	T	307.9	18.6553	1560.98	53	3.03469	15.9991	757.193	0.214855	97.3823	1.51323	31.691			Edmunds 2001
31.4	-106.28	0.3	T	305.4	18.8245	1817.39	41	1.05744	103.315	226.976	0.123929	0.0384706	1.51038	17.1022			Edmunds 2001
15.9	-16.3	2.69	T	290	27.1555	1858	56	0.153688	206.939	414.32	0.156082	0	1.06482	7.69503	Cropland	Clay	Edmunds and Gaye (1994)
15.8	-16.3	14.9	T	290	27.1931	1853	57	0.091016	206.939	467.24	0.156503	0	1.18965	8.6544	Cropland	Coarse sand	Edmunds and Gaye (1994)
19.06	-2.55	0.7	T	52.2	29.8934	2325.59	17	0.0191388	47.8241	2	0.0269796	0	1.56991	4.0599			Edmunds and Gaye (1994)
10.05	26.37	3.05	T	571.7	29.3787	1640.73	67	0.108174	222.086	546.008	0.438079	199.17	1.53831	16.6643			Edmunds et al. (1988)
8.407	5.8	37.5	T	1297.5	28.1126	1328.97	98	0.598863	23.5544	974.976	0.962209	591.422	1.51544	31.9828			Edmunds et al. (1999)
17.61	8.08	31.5	T	320	28.2934	2531.26	26	0.716694	29.0369	2	0.126419	0	1.45603	20.9827			Edmunds et al. (2001)
13.1	10.1	35.3	T	31.4	28.9407	2286	38	0.120656	176.764	729.56	0.0137358	38.2079	1.52244	18.1663	No vegetation	Coarse sand	Edmunds et al. (2002)
35	33	47	T	671.7	19.5109	1401.04	68	2.1914	0	153	0	145.95	0	0			Edmunds et al. 1988
33.85	35.86	95	T	759.6	15.5042	1322	77	5.22661	17.1384	308.118	0	310.288	1.16226	23.7364			Erikson and Khunakasem, 1969
13.4	2.8	3	T	567	30.4209	2152	52	0.355003	204.644	624.18	0.263476	60.7378	1.57382	8.99074	Scrubland	Coarse sand	Favreau et al. (2002)
17.14	9.21	13	T	104	28.5803	2562.98	23	0.273796	18.4562	217.28	0.0452134	0	1.5189	11.2533			Favreau et al. (2002)
46.6	-119.4	1.2	T	159	11.5743	1083	86	1.40859	43.4732	729.74	0.146814	19.3477	1.45376	22.9638	Grassland	Fine sand	Fayer et al. (1996)
46.6	-119.4	5.1	T	159	11.5743	1083	86	1.40859	43.4732	729.74	0.146814	19.3477	1.45376	22.9638	Grassland	Clay	Fayer et al. (1996)
46.6	-119.4	0.02	T	159	11.5743	1083	86	1.40859	43.4732	729.74	0.146814	19.3477	1.45376	22.9638	Scrubland	Fine sand	Fayer et al. (1996)
46.6	-119.4	0.05	T	159	11.5743	1083	86	1.40859	43.4732	729.74	0.146814	19.3477	1.45376	22.9638	Scrubland	ClayFine sand	Fayer et al. (1996)
46.6	-119.4	2	T	159	11.5743	1083	86	1.40859	43.4732	729.74	0.146814	19.3477	1.45376	22.9638	Scrubland	Fine sand	Fayer et al. (1996)
46.6	-119.4	2.75	T	159	11.5743	1083	86	1.40859	43.4732	729.74	0.146814	19.3477	1.45376	22.9638	Scrubland	ClayFine sand	Fayer et al. (1996)
36.75	-116.11	8.5	T	124.3	16.6069	1913.86	38	2.99618	33.9258	450.848	0.0915219	11.0402	1.55376	20.672			Flint et al., 2002
36.9	-116.8	0.23	T	104	17.1708	1754	37	3.18636	33.9258	351.6	0.059293	5.36371	1.54899	20.7072	Scrubland	Fine sand	Fouty (1989)
39.9	101.9	1.5	T	84	8.76417	1010	34	1.03432	21.9378	2.4	0.0831683	0	1.56684	5.32017	Grassland	Coarse sand	Gates et al. (2008)
15.8	-16.4	24	T	290	27.3841	1843	52	0.072708	206.939	466.22	0.157352	0	1.14181	8.45276	Cropland	Coarse sand	Gaye and Edmunds (1996)
15.8	-16.4	31.5	T	290	27.3841	1843	52	0.072708	206.939	466.22	0.157352	0	1.14181	8.45276	Cropland	Coarse sand	Gaye and Edmunds (1996)
-31.6	118.3	0.1	T	328	18.5489	1501	73	0.170616	76.312	128.88	0.218521	13.2764	1.61773	23.4008	Woodland	Clay	George and Frantom, 1988
-31.6	118.3	1.5	T	328	18.5489	1501	73	0.170616	76.312	128.88	0.218521	13.2764	1.61773	23.4008	Woodland	Clay	George and Frantom, 1988
-24.4	25.6	10	T	492	21.7686	1357	55	0.823242	130.028	634.56	0.362564	12.0487	1.54097	22.1925	Scrubland	Coarse sand	Gieske (1992)
-24.3	25.3	9	T	425	21.7564	1372	54	0.450562	130.028	646.16	0.309767	9.43885	1.56441	19.7852	Scrubland	Coarse sand	Gieske et al. (1995)
-24.3	25.3	15	T	425	21.7564	1372	54	0.450562	130.028	646.16	0.309767	9.43885	1.56441	19.7852	Scrubland	Coarse sand	Gieske et al. (1995)
12.38	11.16	15.5	T	541.6	28.6965	2303.7	43	0.137927	219.273	720.662	0.229879	73.7636	1.5606	14.6453			Gieske et al. (1995)
8.93	15.64	35	T	1168.5	27.958	1576.12	85	0.256884	42.4385	885.113	0.647164	402.884	1.53344	31.8818			Goni (2008)
13.6	13.4	7	T	389	29.644	2300	29	0.064205	0	152.97	0.16913	0	0.295547	3.67845	Scrubland	Fine sand	Goni and Edmunds (2001)
12.1	12.8	22.5	T	389	29.063	2184	42	0.082567	216.542	749.84	0.178114	82.9745	1.56345	19.6808	Scrubland	Fine sand	Goni and Edmunds (2001)
31.8	-110.8	3	T	324	17.373	1499	59	2.65648	28.6226	545	0.216144	15.7399	1.47608	21.2029	Scrubland	ClayLoam	Goodrich et al. (2004)
22.9	76.6	67	T	750	26.614	1690	42	0.434234	10.8486	742.86	0.443787	498.04	1.64516	52.5079	Cropland	Coarse sand	Gupta and Sharma (1984)
22.9	76.6	81	T	894	26.614	1690	42	0.434234	10.8486	742.86	0.528994	498.04	1.64516	52.5079	Cropland	Coarse sand	Gupta and Sharma (1984)
22.9	76.6	94	T	821	26.614	1690	42	0.434234	10.8486	742.86	0.485799	498.04	1.64516	52.5079	Cropland	Coarse sand	Gupta and Sharma (1984)
-21.07	132.98	1.9	T	290	25.5853	2265.72	41	0.173275	144.578	293.672	0.127995	31.5376	1.56674	12.6729			Harrington et al. 2002
37.1	-113.3	0.3	T	210	11.9061	1639	54	4.03671	24.1115	391.68	0.128127	29.163	1.43461	23.7637	Scrubland	Loam	Heilweil et al. (2006)
37.1	-113.3	4	T	210	11.9061	1639	54	4.03671	24.1115	391.68	0.128127	29.163	1.43461	23.7637	Scrubland	Loam	Heilweil et al. (2006)
37.1	-113.3	6.8	T	210	11.9061	1639	54	4.03671	24.1115	391.68	0.128127	29.163	1.43461	23.7637	Scrubland	Loam	Heilweil et al. (2006)
37.1	-113.3	10	T	210	11.9061	1639	54	4.03671	24.1115	391.68	0.128127	29.163	1.43461	23.7637	Scrubland	Loam	Heilweil et al. (2006)
37	108	33	T	523	8.24767	8.5	89	1.75182	18.6828	757	61.5294	19.6537	1.50953	24.5105			Huang and Pang (2011)
37	108	77.5	T	450	8.24767	6.6	89	1.75182	18.6828	757	68.1818	19.6537	1.50953	24.5105			Huang and Pang (2011)
-35.1	140.1	16.5	T	340	16.7142	1335	94	0.103295	46.4103	241.36	0.254682	22.9971	1.52806	20.5647	Cropland	Clay	Hughes et al. (1988)
31.1	33.8	18	T	300	21.5593	1405	30	0.408725	0	111.68	0.213523	0	0.865888	11.5714	No vegetation	Coarse sand	Hussein (2001)
31.1	33.8	24	T	300	21.5593	1405	30	0.408725	0	111.68	0.213523	0	0.865888	11.5714	No vegetation	Coarse sand	Hussein (2001)
-33.4	115.9	28.1	T	1220	16.9204	1504	132	0.407302	124.171	719.92	0.81117	288.106	1.43907	20.2603	Woodland	Clay	Johnston (1987)
-33.4	115.9	75	T	1220	16.9204	1504	132	0.407302	124.171	719.92	0.81117	288.106	1.43907	20.2603	Woodland	Clay	Johnston (1987)
-33.3	116.4	2.45	T	800	16.3822	1423	126	0.33327	146.513	562.04	0.562193	249.784	1.52677	20.9636	Woodland	Clay	Johnston (1987)
-33.4	115.9	26.5	T	1250	16.9204	1504	132	0.407302	124.171	719.92	0.831117	288.106	1.43907	20.2603	Woodland	Coarse sand	Johnston (1987)
-35.1	140.3	45	T	370	16.7466	1346	93	0.113436	46.4103	288.48	0.274889	20.5963	1.52487	19.9815	Cropland	Coarse sand	Jolly et al. (1989)
-35.1	140.3	0.8	T	370	16.7466	1346	93	0.113436	46.4103	288.48	0.274889	20.5963	1.52487	19.9815	Woodland	Coarse sand	Jolly et al. (1989)
52.1	-106.1	12	T	371	2.53866	699	81	0.291473	69.9642	686	0.530758	48.1761	1.32289	25.6574	Cropland	Coarse sand	Joshi (1997)
52.1	-106.1	1	T	371	2.53866	699	81	0.291473	69.9642	686	0.530758	48.1761	1.32289	25.6574	Grassland	Coarse sand	Joshi (1997)
31.97	-99.9	1.43	T	649.8	18.978	1657.24	66	0.52912	26.4004	941.268	0.359454	30.6256	1.33184	21.1664			Keese et al. (2005)
31.97	-99.9	0.673	T	649.8	18.978	1657.24	66	0.52912	26.4004	941.268	0.359454	30.6256	1.33184	21.1664			Keese et al. (2005)
-35.1	141.9	9	T	340	17.0785	1373	76	0.059607	41.5543	196.88	0.247633	9.07256	1.52671	19.5999	Cropland	Clay	Kennett-Smith et al. (1994)
52.3	5.6	305	T	854	10.0099	518	186	0.165032	199.783	826.16	1.64865	0	1.15745	17.8984	Cropland	Coarse sand	Krajenbrink et al. (1988)
52.3	5.6	305	T	854	10.0099	518	186	0.165032	199.783	826.16	1.64865	0	1.15745	17.8984	Grassland	Coarse sand	Krajenbrink et al. (1988)
52.3	5.6	101	T	854	10.0099	518	186	0.165032	199.783	826.16	1.64865	0	1.15745	17.8984	Woodland	Coarse sand	Krajenbrink et al. (1988)
-24.3	29.9	11.5	T	465	19.9293	1341	70	4.66486	68.3419	769.6	0.346756	68.9566	1.53054	33.2406	Scrubland	Coarse sand	Külls (2000)
56.4	8.9	733	T	1077	8.62322	450	184	0.278644	92.5671	766.7	2.39333	394.324	1.20494	17.1405	Scrubland	Coarse sand	Ladekarl et al. (2005)
56.4	9.4	390	T	875	8.32756	445	184	0.370492	94.7026	849.2	1.96629	366.571	1.22915	17.1691	Woodland	Coarse sand	Ladekarl et al. (2005)
-19.9	28.3	25	T	550	20.7757	1528	66	0.380399	114.218	663.32	0.359948	95.6246	1.55373	22.8548	Scrubland	Coarse sand	Larsen et al. (2002)
-34.1	139.9	0.15	T	275	17.6261	1394	70	0.125627	22.0447	233.44	0.197274	2.85538	1.5408	20.9149	Woodland	Coarse sand	Leaney and Allison (1986)
-34.1	139.9	0.25	T	275	17.6261	1394	70	0.125627	22.0447	233.44	0.197274	2.85538	1.5408	20.9149	Woodland	Coarse sand	Leaney and Allison (1986)
-36.3	140.8	1.1	T	545	15.5541	1245	114	0.095782	31.7812	210.64	0.437751	78.2431	1.57441	25.852	Cropland	Clay	Leaney and Herczeg (1995)
-36.3	140.8	10	T	454	15.5541	1245	114	0.095782	31.7812	210.64	0.364659	78.2431	1.57441	25.852	Cropland	Clay	Leaney and Herczeg (1995)
-36.3	140.8	60	T	545	15.5541	1245	114	0.095782	31.7812	210.64	0.437751	78.2431	1.57441	25.852	Cropland	Coarse sand	Leaney and Herczeg (1995)
-36.3	140.8	0.5	T	545	15.5541	1245	114	0.095782	31.7812	210.64	0.437751	78.2431	1.57441	25.852	Woodland	Clay	Leaney and Herczeg (1995)
-36.3	140.8	0.5	T	545	15.5541	1245	114	0.095782	31.7812	210.64	0.437751	78.2431	1.57441	25.852	Woodland	Coarse sand	Leaney and Herczeg (1995)
-35.3	140.8	12	T	375	16.7185	1346	93	0.091174	46.4103	195.44	0.278603	18.944	1.51207	18.5163	Grassland	Clay	Leaney and Herczeg (1999)
-35.3	140.9	0.3	T	440	16.742	1345	91	0.084982	46.4103	184.32	0.327138	17.7694	1.51205	18.4717	Woodland	Clay	Leaney and Herczeg (1999)
-36.6	141.3	1.5	T	450	15.1196	1216	117	0.089585	18.0192	457.38	0.370066	85.3191	1.60744	28.4335	Woodland	Coarse sand	Leaney and Herczeg (1999)
13.6	2.6	3	T	565	30.4842	2162	51	0.445046	204.644	626	0.261332	48.2305	1.57508	8.2573	Scrubland	Coarse sand	Leduc et al. (2001)
13.6	2.6	6	T	565	30.4842	2162	51	0.445046	204.644	626	0.261332	48.2305	1.57508	8.2573	Scrubland	Coarse sand	Leduc et al. (2001)
13.47	2.33	25	T	466.1	30.6188	2324.31	51	0.494589	204.644	621.585	0.227947	54.246	1.57154	8.8095			Leduc et al. (2001)
42.9	118.9	47	T	360	6.7709	899	73	1.4856	20.2552	447.6	0.400445	30.5836	1.32088	24.6022	No vegetation	ClayFine sand	Lin and Wei (2001)
37.8	113.8	68	T	550	10.5369	931	90	3.10716	20.1486	233.1	0.590763	74.3106	1.42578	30.9313	No vegetation	ClayFine sand	Lin and Wei (2001)
42.9	118.9	85	T	360	6.7709	899	73	1.4856	20.2552	447.6	0.400445	30.5836	1.32088	24.6022	No vegetation	ClayFine sand	Lin and Wei (2001)
37.8	113.8	288	T	550	10.5369	931	90	3.10716	20.1486	233.1	0.590763	74.3106	1.42578	30.9313	No vegetation	ClayFine sand	Lin and Wei (2001)
42.87	118.93	47	T	360	6.93763	1031.61	73	1.46509	20.2552	478.02	0.348969	30.5142	1.31976	24.5093			Lin and Wei (2005)
-32.9	121.6	15	T	390	16.9387	1462	100	0.310243	48.2718	268.2	0.266758	29.063	1.59093	26.3068	Cropland	Coarse sand	Loh and Stokes (1981)
-27.5	135	0.16	T	335.8	22.3941	2063.29	32	0.108425	47.4475	628	0.0889739	0.136029	1.65005	37.3573			Love et al. 2000
21.3	-101.617	25	T	547	18.2635	1449.26	67	2.13985	29.6801	463	0.3894	69.5978	1.33317	25.4962			Mahlknecht et al. 2004
40.76	-111.89	210	T	646.2	8.68093	1190.69	93	4.51824	18.5207	632.964	0.483634	150.577	1.43125	27.7457			Manning & Solomon 2004
37.8	-100.8	53	T	487	13.0834	1419	79	0.187554	69.7212	554.91	0.343199	8.73206	1.38845	16.8923	Cropland	Coarse sand	McDowall et al. (2003)
37.3	-101.8	5.1	T	453	13.1659	1464	75	0.265322	70.1557	520.22	0.309426	1.93929	1.42614	19.3652	Grassland	Fine sand	McDowall et al. (2003)
33.6	-102.8	17	T	420	16.2147	1627	59	0.189371	36.9303	534.03	0.258144	4.70385	1.50571	17.0698	Cropland	Loam	McMahon et al. (2006)
33.8	-102.8	24.5	T	440	15.9836	1622	60	0.201467	36.9303	538.09	0.27127	4.46753	1.46744	18.0453	Cropland	Loam	McMahon et al. (2006)
33.6	-102.8	32	T	420	16.2147	1627	59	0.189371	36.9303	534.03	0.258144	4.70385	1.50571	17.0698	Cropland	Loam	McMahon et al. (2006)
33.8	-102.8	39	T	420	15.9836	1622	60	0.201467	36.9303	538.09	0.25894	4.46753	1.46744	18.0453	Cropland	Clay	McMahon et al. (2006)
33.8	-102.8	54	T	420	15.9836	1622	60	0.201467	36.9303	538.09	0.25894	4.46753	1.46744	18.0453	Cropland	Fine sand	McMahon et al. (2006)
33.8	-102.8	102	T	420	15.9836	1622	60	0.201467	36.9303	538.09	0.25894	4.46753	1.46744	18.0453	Cropland	Clay	McMahon et al. (2006)
33.8	-102.8	111	T	420	15.9836	1622	60	0.201467	36.9303	538.09	0.25894	4.46753	1.46744	18.0453	Cropland	Clay	McMahon et al. (2006)
34.1	-102.8	0.2	T	420	15.7195	1595	61	0.224669	24.4735	544.18	0.263323	5.2365	1.41004	19.5087	Grassland	Fine sand	McMahon et al. (2006)
37.3	-101.8	5	T	453	13.1659	1464	75	0.265322	70.1557	520.22	0.309426	1.93929	1.42614	19.3652	Grassland	Fine sand	McMahon et al. (2006)
40.6	-101.8	70	T	500	11.1366	1191	87	0.281166	82.2402	684.62	0.419815	6.66729	1.38307	16.1839	Grassland	Coarse sand	Mileham et al. (2008)
31	34.75	41	T	45.1	20.4356	1632.13	43	1.5467	31.4336	275.375	0.0801955	1.59265	1.46834	25.4088			Nativ et al. 1995
24.9	71.1	12	T	240	27.3623	1872	13	0.361392	59.901	178.16	0.128205	31.8972	1.53711	14.5142	Cropland	Fine sand	Navada et al. (2001)
24.9	71.1	14.5	T	240	27.3623	1872	13	0.361392	59.901	178.16	0.128205	31.8972	1.53711	14.5142	Cropland	Fine sand	Navada et al. (2001)
24.9	71.1	18	T	240	27.3623	1872	13	0.361392	59.901	178.16	0.128205	31.8972	1.53711	14.5142	Cropland	Fine sand	Navada et al. (2001)
25.4	71.1	20	T	240	26.8025	1836	14	0.514965	109.332	31.36	0.130719	15.3663	1.56835	8.61221	Cropland	Fine sand	Navada et al. (2001)
35.8	-106.3	1	T	470	9.42804	1444	68	2.52862	41.6265	542.8	0.325485	12.3392	1.52746	22.9009	Grassland	Loam	Newman et al. (1997)
35.8	-106.3	0.45	T	510	9.42804	1444	68	2.52862	41.6265	542.8	0.353186	12.3392	1.52746	22.9009	Woodland	Loam	Newman et al. (1997)
35.8	-106.3	0.8	T	470	9.42804	1444	68	2.52862	41.6265	542.8	0.325485	12.3392	1.52746	22.9009	Woodland	Loam	Newman et al. (1997)
28.4	-110.8	0.11	T	320	25.4928	1737	31	1.30185	21.4957	74.91	0.184226	3.36971	1.33193	20.2113	Scrubland	Coarse sand	Ojeda (2001)
28.4	-110.8	0.16	T	320	25.4928	1737	31	1.30185	21.4957	74.91	0.184226	3.36971	1.33193	20.2113	Scrubland	Coarse sand	Ojeda (2001)
31.6	-106.9	0.24	T	230	18.5498	1780	42	0.567319	103.315	146.42	0.129213	0.627235	1.52105	16.8949	Scrubland	Coarse sand	Ojeda (2001)
-31.6	116.3	13.4	T	660	18.158	1620	98	0.493493	85.8185	484.04	0.407407	132.491	1.51868	22.3571	Woodland	Coarse sand	Peck and Hurle(1973)
-32.9	116.3	24.2	T	1100	16.335	1470	123	0.429899	141.936	491.84	0.748299	307.122	1.36527	18.6855	Woodland	Coarse sand	Peck and Hurle(1973)
-33.3	116.3	33.4	T	870	16.3451	1456	128	0.37365	146.513	582.08	0.597527	273.976	1.49102	20.5595	Woodland	Coarse sand	Peck and Hurle(1973)
-32.8	116.1	106	T	1350	16.8724	1517	123	0.459532	141.936	421.56	0.889914	318.294	1.11335	15.2871	Woodland	Coarse sand	Peck and Hurle(1973)
-32.3	116.1	134	T	1147	17.4004	1546	114	0.410941	141.936	327.84	0.741915	255.547	1.04933	14.0869	Woodland	Coarse sand	Peck and Hurle(1973)
-32.3	116.1	157	T	1100	17.4004	1559	114	0.410941	141.936	327.84	0.705581	255.547	1.04933	14.0869	Woodland	Coarse sand	Peck and Hurle(1973)
34.26	-106.9	2.6	T	345.4	11.905	1482.86	61	1.78748	54.0147	529.856	0.227399	5.07068	1.54501	19.3707			Phillips et al. 1988
32.31	-106.75	1.5	T	279.9	16.2156	1638.49	48	1.71103	69.6716	462	0.164886	2.24835	1.53162	15.9946			Phillips et al. 1988
34.8333	-114.983	0.04	T	132.9	20.6985	2095.75	29	2.08258	33.9608	373.862	0.0728036	3.06992	1.55942	21.1381			Prudic 1994
46.6	-119.4	1.2	T	160	11.5743	1083	86	1.40859	43.4732	729.74	0.147738	19.3477	1.45376	22.9638	Grassland	Loam	Prych (1998)
46.6	-119.4	5.1	T	160	11.5743	1083	86	1.40859	43.4732	729.74	0.147738	19.3477	1.45376	22.9638	Grassland	Loam	Prych (1998)
46.6	-119.4	0.06	T	160	11.5743	1083	86	1.40859	43.4732	729.74	0.147738	19.3477	1.45376	22.9638	Scrubland	ClayFine sand	Prych (1998)
46.6	-119.4	0.15	T	160	11.5743	1083	86	1.40859	43.4732	729.74	0.147738	19.3477	1.45376	22.9638	Scrubland	Loam	Prych (1998)
46.6	-119.4	2.6	T	160	11.5743	1083	86	1.40859	43.4732	729.74	0.147738	19.3477	1.45376	22.9638	Scrubland	Loam	Prych (1998)
-24.8	150.1	1.6	T	700	21.7123	1502	70	0.396789	45.974	334.96	0.466045	29.1075	1.61059	33.6638	Cropland	Clay	Radford et al. (2009)
-23.9	150.3	2	T	659	22.1123	1600	84	0.461307	51.7981	350.84	0.411875	75.6766	1.60014	32.1259	Cropland	Clay	Radford et al. (2009)
-23.1	148.1	7.4	T	597	23.2352	1638	64	0.272719	18.3601	608.24	0.364469	61.2276	1.62641	35.984	Cropland	Clay	Radford et al. (2009)
-24.3	149.8	8.9	T	632	21.8638	1548	73	0.324501	42.0922	219.88	0.408269	37.5929	1.6237	33.8732	Cropland	Clay	Radford et al. (2009)
-23.9	148.4	16.1	T	600	22.423	1596	64	0.310256	18.3601	560.92	0.37594	34.295	1.61608	34.9734	Cropland	Clay	Radford et al. (2009)
-22.9	148.9	18	T	580	23.0427	1621	79	0.15818	42.1919	492.04	0.357804	118.863	1.63204	34.6174	Cropland	Clay	Radford et al. (2009)
-21.3	150.4	27.5	T	639	1.59863	1579	7	0.001242	0	0	0.404687	0	0	0	Cropland	Clay	Radford et al. (2009)
-22.9	148.9	0.2	T	580	23.0427	1621	79	0.15818	42.1919	492.04	0.357804	118.863	1.63204	34.6174	Woodland	Clay	Radford et al. (2009)
-23.9	148.4	0.2	T	600	22.423	1596	64	0.310256	18.3601	560.92	0.37594	34.295	1.61608	34.9734	Woodland	Clay	Radford et al. (2009)
-23.9	150.3	0.2	T	659	22.1123	1600	84	0.461307	51.7981	350.84	0.411875	75.6766	1.60014	32.1259	Woodland	Clay	Radford et al. (2009)
-24.3	149.8	0.3	T	632	21.8638	1548	73	0.324501	42.0922	219.88	0.408269	37.5929	1.6237	33.8732	Woodland	Clay	Radford et al. (2009)
-24.3	149.8	0.3	T	638	21.8638	1548	73	0.324501	42.0922	219.88	0.412145	37.5929	1.6237	33.8732	Woodland	Clay	Radford et al. (2009)
-24.8	150.1	0.3	T	700	21.7123	1502	70	0.396789	45.974	334.96	0.466045	29.1075	1.61059	33.6638	Woodland	Clay	Radford et al. (2009)
-24.3	150.4	0.3	T	639	21.9202	1579	79	0.506988	45.974	388.84	0.404687	57.7541	1.60261	33.4149	Woodland	Clay	Radford et al. (2009)
-23.1	148.1	1.7	T	597	23.2352	1638	64	0.272719	18.3601	608.24	0.364469	61.2276	1.62641	35.984	Woodland	Clay	Radford et al. (2009)
30.5	74.5	103.5	T	463.5	26.0881	1541.54	31	0.14225	26.7075	585	0.297305	35.3978	1.4955	17.256			Rangarajan & Athavale 2000
8.8	78.1	16.3	T	582	28.7989	1514	67	0.180787	0	354.36	0.384412	0	0.887824	21.159	Cropland	Clay	Rangarajan etal. (2009)
8.8	78.1	47.6	T	582	28.7989	1514	67	0.180787	0	354.36	0.384412	0	0.887824	21.159	Cropland	Coarse sand	Rangarajan etal. (2009)
8.8	78.1	60	T	582	28.7989	1514	67	0.180787	0	354.36	0.384412	0	0.887824	21.159	Cropland	Clay	Rangarajan etal. (2009)
8.8	78.1	70.2	T	582	28.7989	1514	67	0.180787	0	354.36	0.384412	0	0.887824	21.159	Cropland	Clay	Rangarajan etal. (2009)
8.8	78.1	82.3	T	582	28.7989	1514	67	0.180787	0	354.36	0.384412	0	0.887824	21.159	Cropland	Coarse sand	Rangarajan etal. (2009)
49.9	-112.8	11.6	T	400	5.67497	851	82	0.461459	25.5195	885.72	0.470035	28.7273	1.26593	24.278	Cropland	Loam	Rodvang et al. (2004)
49.9	-112.8	29.7	T	400	5.67497	851	82	0.461459	25.5195	885.72	0.470035	28.7273	1.26593	24.278	Cropland	Coarse sand	Rodvang et al. (2004)
49.9	-112.8	117	T	400	5.67497	851	82	0.461459	25.5195	885.72	0.470035	28.7273	1.26593	24.278	Cropland	Coarse sand	Rodvang et al. (2004)
49.9	-112.8	170	T	400	5.67497	851	82	0.461459	25.5195	885.72	0.470035	28.7273	1.26593	24.278	Cropland	Coarse sand	Rodvang et al. (2004)
49.9	-112.8	42	T	400	5.67497	851	82	0.461459	25.5195	885.72	0.470035	28.7273	1.26593	24.278	Grassland	Coarse sand	Rodvang et al. (2004)
13.22	2.89	175	T	523.2	30.4299	2277.11	53	0.281851	204.644	621.559	0.248977	72.2835	1.57082	10.4692			Rueedi et al.(2005)
37.6833	113.683	113	T	436.1	9.82811	1019.28	93	3.05532	20.1486	178.228	0.505733	77.9777	1.42082	31.3429			Ruifen & Keqin 2001
42.8667	118.933	87	T	306	6.95648	1032.09	73	1.46298	20.2552	481.366	0.371187	30.5044	1.31963	24.4994			Ruifen & Keqin 2001
-32.8333	117.183	0.7	T	471.5	16.6743	1338.16	106	0.178742	20.7227	541.443	0.341469	92.7818	1.60094	26.9713			Salama et al. 1993
-32.8	26.1	5.2	T	460	17.694	1342	86	3.5309	35.2301	469.2	0.342772	18.479	1.50586	22.1035	Grassland	Loam	Sami and Hughes (1996)
-33.6	-65.8	5.3	T	518	16.8479	1317	76	0.51909	48.0322	141.89	0.393318	13.0334	1.47435	19.1442	Cropland	Clay	Santoni et al. (2010)
-33.6	-65.8	6.9	T	502	16.8479	1317	76	0.51909	48.0322	141.89	0.381169	13.0334	1.47435	19.1442	Cropland	Clay	Santoni et al. (2010)
-33.6	-65.8	7.9	T	502	16.8479	1317	76	0.51909	48.0322	141.89	0.381169	13.0334	1.47435	19.1442	Cropland	Clay	Santoni et al. (2010)
-33.8	-65.8	9.6	T	542	16.88	1294	76	0.337265	48.0322	139.47	0.418856	15.9274	1.4895	16.9317	Cropland	Clay	Santoni et al. (2010)
-33.4	-65.9	10.4	T	538	16.9308	1383	75	0.90503	48.0322	131.1	0.389009	9.46241	1.47647	21.0387	Cropland	Clay	Santoni et al. (2010)
-33.6	-65.8	10.8	T	518	16.8479	1317	76	0.51909	48.0322	141.89	0.393318	13.0334	1.47435	19.1442	Cropland	Clay	Santoni et al. (2010)
-33.4	-65.9	13.2	T	538	16.9308	1383	75	0.90503	48.0322	131.1	0.389009	9.46241	1.47647	21.0387	Cropland	Clay	Santoni et al. (2010)
-33.8	-65.8	128	T	542	16.88	1294	76	0.337265	48.0322	139.47	0.418856	15.9274	1.4895	16.9317	Cropland	Clay	Santoni et al. (2010)
-33.4	-66.6	0.02	T	447	18.1615	1476	68	0.814611	18.7594	111.3	0.302846	4.65703	1.53292	22.9159	Woodland	Clay	Santoni et al. (2010)
-33.4	-65.9	0.04	T	538	16.9308	1383	75	0.90503	48.0322	131.1	0.389009	9.46241	1.47647	21.0387	Woodland	Clay	Santoni et al. (2010)
-33.6	-65.8	0.05	T	502	16.8479	1317	76	0.51909	48.0322	141.89	0.381169	13.0334	1.47435	19.1442	Woodland	Clay	Santoni et al. (2010)
-33.6	-65.8	0.14	T	518	16.8479	1317	76	0.51909	48.0322	141.89	0.393318	13.0334	1.47435	19.1442	Woodland	Clay	Santoni et al. (2010)
-33.8	-65.8	0.33	T	542	16.88	1294	76	0.337265	48.0322	139.47	0.418856	15.9274	1.4895	16.9317	Woodland	Clay	Santoni et al. (2010)
31.4	-105.8	0.07	T	280	18.4723	1766	42	1.33062	36.8051	361.76	0.15855	0.6235	1.48151	20.7811	Scrubland	ClayFine sand	Scanlon (1991)
35.3	-105.8	0.62	T	500	10.3607	1571	67	1.76674	31.0599	555.82	0.318269	11.3886	1.51811	22.507	Grassland	ClayLoam	Scanlon and Goldsmith (1997)
32.8	-101.9	19	T	452	18.0003	1677	58	0.296886	20.2469	709.24	0.269529	7.79129	1.48911	18.0895	Cropland	Fine sand	Scanlon et al (2007).
32.8	-101.9	31	T	449	18.0003	1677	58	0.296886	20.2469	709.24	0.26774	7.79129	1.48911	18.0895	Cropland	Fine sand	Scanlon et al (2007).
32.8	-101.9	39	T	446	18.0003	1677	58	0.296886	20.2469	709.24	0.265951	7.79129	1.48911	18.0895	Cropland	Fine sand	Scanlon et al (2007).
32.8	-101.9	0	T	426	18.0003	1677	58	0.296886	20.2469	709.24	0.254025	7.79129	1.48911	18.0895	Grassland	Fine sand	Scanlon et al (2007).
31.1	-105.3	0.02	T	320	18.3838	1737	42	1.51739	36.8051	377.72	0.184226	0.442412	1.47003	22.9318	Grassland	Clay	Scanlon et al. (1999)
31.1	-105.3	0.05	T	320	18.3838	1737	42	1.51739	36.8051	377.72	0.184226	0.442412	1.47003	22.9318	Grassland	Loam	Scanlon et al. (1999)
32.9	-102.1	19.5	T	457	17.7447	1670	57	0.212442	42.4297	633.28	0.273653	7.23124	1.50598	17.429	Cropland	Clay	Scanlon et al. (2005)
32.9	-102.1	24	T	457	17.7447	1670	57	0.212442	42.4297	633.28	0.273653	7.23124	1.50598	17.429	Cropland	Coarse sand	Scanlon et al. (2005)
32.9	-102.1	2	T	457	17.7447	1670	57	0.212442	42.4297	633.28	0.273653	7.23124	1.50598	17.429	Grassland	Coarse sand	Scanlon et al. (2005)
36.8	-116.8	0.5	T	113	17.8738	1870	36	3.53437	33.9258	391.7	0.0604278	4.48947	1.55069	20.7269	Scrubland	Coarse sand	Scanlon et al. (2005)
34.64	-101.28	1.25	T	528.1	15.9555	1640.22	66	1.00032	37.451	669.159	0.316334	5.61348	1.29182	21.8631			Scanlon et al. 2005
27.47	70.62	75.5	T	165	26.6501	1790.37	13	0.216959	95.214	2	0.0921599	0	1.5518	11.313			Scanlon et al.(2010)
-24.1	25.3	8	T	400	21.9191	1372	53	0.346164	130.028	604.12	0.291545	8.37521	1.57736	18.6919	Scrubland	Coarse sand	Selaolo (1998)
-19.08	14.58	176	T	902	19.4551	2300	46	1.00327	31.4965	216.825	0.392174	6.86487	1.65784	22.8106			Selaolo et al. (1996)
-19.08	14.58	1375	T	400	19.4551	1327.68	46	1.00327	31.4965	216.825	0.301278	6.86487	1.65784	22.8106			Selaolo et al. (1996)
-23.6	24.3	0.5	T	400	22.6633	1433	49	0.113921	254.574	488.76	0.279135	3.41053	1.63299	13.282	Scrubland	Coarse sand	Selaolo et al. (2003)
-23.6	24.3	1.1	T	400	22.6633	1433	49	0.113921	254.574	488.76	0.279135	3.41053	1.63299	13.282	Scrubland	Coarse sand	Selaolo et al. (2003)
-23.6	24.3	3.8	T	400	22.6633	1433	49	0.113921	254.574	488.76	0.279135	3.41053	1.63299	13.282	Scrubland	Coarse sand	Selaolo et al. (2003)
-24.1	25.1	4	T	420	21.9382	1384	53	0.278843	130.028	588.64	0.303468	7.32118	1.59033	17.4151	Scrubland	Coarse sand	Selaolo et al. (2003)
-24.1	25.1	9.8	T	420	21.9382	1384	53	0.278843	130.028	588.64	0.303468	7.32118	1.59033	17.4151	Scrubland	Coarse sand	Selaolo et al. (2003)
-25.3	25.6	11	T	500	20.8476	1394	58	1.19463	113.697	696.32	0.35868	20.8402	1.55815	24.4393	Scrubland	Coarse sand	Selaolo et al. (2003)
-25.3	25.6	16	T	500	20.8476	1394	58	1.19463	113.697	696.32	0.35868	20.8402	1.55815	24.4393	Scrubland	Coarse sand	Selaolo et al. (2003)
23.1	73.3	62.7	T	835	28.038	1734	33	0.251641	13.8094	742.84	0.481546	410.259	1.5872	39.3417	Cropland	Clay	Sharda et al. (2006)
26.3	73.1	16.6	T	219	27.6796	1963	19	0.516396	24.1686	123	0.111564	31.6579	1.56264	18.4692	Cropland	Coarse sand	Sharma and Gupta (1987)
26.3	73.1	17.4	T	219	27.6796	1963	19	0.516396	24.1686	123	0.111564	31.6579	1.56264	18.4692	Cropland	Coarse sand	Sharma and Gupta (1987)
26.6	72.8	21.8	T	389	27.3524	1907	17	0.353556	88.1892	37.43	0.203985	13.0951	1.56861	13.487	No vegetation	Coarse sand	Sharma and Gupta (1987)
26.3	73.1	22.1	T	219	27.6796	1963	19	0.516396	24.1686	123	0.111564	31.6579	1.56264	18.4692	No vegetation	Coarse sand	Sharma and Gupta (1987)
26.8	71.3	22.3	T	165	26.4517	1770	15	0.217815	85.8277	2	0.0932203	1.14162	1.54388	12.0653	No vegetation	Coarse sand	Sharma and Gupta (1987)
26.3	73.1	25.7	T	219	27.6796	1963	19	0.516396	24.1686	123	0.111564	31.6579	1.56264	18.4692	No vegetation	Coarse sand	Sharma and Gupta (1987)
26.6	72.8	46.8	T	389	27.3524	1907	17	0.353556	88.1892	37.43	0.203985	13.0951	1.56861	13.487	No vegetation	Coarse sand	Sharma and Gupta (1987)
-31.953	115.858	775	T	687.5	18.6429	1521.13	110	0.280509	265.747	280.11	0.43809	188.987	1.07285	12.3801			Sharma nad Hughes, 1985
-18.53	27.55	40.5	T	555	23.1775	1464.95	69	0.517154	107.95	808.969	0.378852	133.422	1.56623	24.8412			Sibanda et al. (2009)
-24.8	149.8	19.8	T	720	21.6767	1510	67	0.268467	42.0922	241.48	0.476821	25.3666	1.62116	34.2319	Cropland	Clay	Silburn et al. (2009)
-24.8	149.8	0.16	T	720	21.6767	1510	67	0.268467	42.0922	241.48	0.476821	25.3666	1.62116	34.2319	Grassland	Clay	Silburn et al. (2009)
-24.8	149.8	32.4	T	720	21.6767	1510	67	0.268467	42.0922	241.48	0.476821	25.3666	1.62116	34.2319	No vegetation	Clay	Silburn et al. (2009)
-24.8	149.8	0.17	T	720	21.6767	1510	67	0.268467	42.0922	241.48	0.476821	25.3666	1.62116	34.2319	Woodland	Clay	Silburn et al. (2009)
-24.8	149.8	0.26	T	720	21.6767	1510	67	0.268467	42.0922	241.48	0.476821	25.3666	1.62116	34.2319	Woodland	Clay	Silburn et al. (2009)
46.6	-119.4	127	T	240	11.5743	1083	86	1.40859	43.4732	729.74	0.221607	19.3477	1.45376	22.9638	No vegetation	Coarse sand	Stone et al. (1983)
38.6	-116.1	66	T	113	9.29075	1358	62	3.03337	28.2264	330.2	0.0832106	18.309	1.50975	19.7342	Scrubland	Coarse sand	Stonestrom et al. (2003)
20.25	41.75	69.1	T	345	22.1277	2016.88	40	1.4224	29.0942	2	0.171056	0	1.46301	21.5223			Subyani (2004)
11.9	79.8	80	T	1200	27.2815	1702	50	0.161076	25.4671	361.9	0.705053	0	1.09549	26.4689	Cropland	Coarse sand	Sukhija et al. (1988)
11.9	79.8	110	T	1200	27.2815	1702	50	0.161076	25.4671	361.9	0.705053	0	1.09549	26.4689	Cropland	Coarse sand	Sukhija et al. (1988)
11.9	79.8	130	T	1200	27.2815	1702	50	0.161076	25.4671	361.9	0.705053	0	1.09549	26.4689	Cropland	Coarse sand	Sukhija et al. (1988)
11.9	79.8	160	T	1200	27.2815	1702	50	0.161076	25.4671	361.9	0.705053	0	1.09549	26.4689	Cropland	Coarse sand	Sukhija et al. (1988)
11.9	79.8	180	T	1200	27.2815	1702	50	0.161076	25.4671	361.9	0.705053	0	1.09549	26.4689	Cropland	Coarse sand	Sukhija et al. (1988)
11.9	79.8	200	T	1200	27.2815	1702	50	0.161076	25.4671	361.9	0.705053	0	1.09549	26.4689	Cropland	Coarse sand	Sukhija et al. (1988)
22.8	72.3	39.5	T	595.3	28.4345	1923.48	27	0.068247	22.6608	769.48	0.356652	265.551	1.53567	29.3661			Sukhija et al. 2003
11	79.55	235	T	1417.9	29.7581	1698.64	52	0.07798	25.4671	502.075	0.736669	541.308	1.4611	30.2144			Sukhija et al. 2003
16.6	78.5	120	T	943.4	28.2445	1851.87	47	0.90465	15.5431	517	0.438894	163.767	1.48668	37.2207			Sukhija et al. 2003
2.6	32.6	200	T	1400	25.0818	1558	149	0.705452	23.1539	875.56	0.898588	345.622	1.32701	47.3943	Cropland	Clay	Taylor and Howard (1996)
-24.8	149.8	17.6	T	650	21.6767	1510	67	0.268467	42.0922	241.48	0.430464	25.3666	1.62116	34.2319	Cropland	Clay	Thorburn et al. (1991)
-24.8	149.8	2.3	T	650	21.6767	1510	67	0.268467	42.0922	241.48	0.430464	25.3666	1.62116	34.2319	Grassland	Clay	Thorburn et al. (1991)
-24.8	149.8	0	T	650	21.6767	1510	67	0.268467	42.0922	241.48	0.430464	25.3666	1.62116	34.2319	Woodland	Clay	Thorburn et al. (1991)
36.75	-116.11	7.6	T	124.3	16.6069	1913.86	38	2.99618	33.9258	450.848	0.0915219	11.0402	1.55376	20.672			Tyler et al. 1992
-22.1	26.3	6	T	500	22.1382	1408	50	0.198002	140.15	609	0.355114	16.3151	1.5708	21.5146	Scrubland	Coarse sand	Verhagen (1994)
-23.8	25.1	6	T	450	22.2227	1396	52	0.192929	209.019	528.82	0.32235	6.80453	1.60623	16.1286	Scrubland	Coarse sand	Verhagen (1994)
-23.8	25.1	11.5	T	450	22.2227	1396	52	0.192929	209.019	528.82	0.32235	6.80453	1.60623	16.1286	Scrubland	Coarse sand	Verhagen (1994)
-34.3	141.3	4.7	T	295	17.7646	1387	68	0.103737	30.1468	188.96	0.212689	1.73303	1.55281	21.9345	Grassland	Clay	Walker et al. (1990)
-36.8	140.9	1	T	520	14.9344	1210	129	0.093248	31.7812	424.02	0.429752	121.303	1.5612	27.9564	Grassland	Clay	Walker et al. (1990)
-36.3	140.8	5	T	500	15.5541	1245	114	0.095782	31.7812	210.64	0.401606	78.2431	1.57441	25.852	Grassland	Clay	Walker et al. (1990)
-36.9	140.8	8.5	T	580	14.878	1207	133	0.093388	31.7812	478.92	0.48053	136.831	1.54169	27.7153	Grassland	Clay	Walker et al. (1990)
-35.4	139.4	60	T	580	16.5006	1299	108	0.194889	28.3679	99.04	0.446497	49.3101	1.39155	20.0127	Grassland	Coarse sand	Walker et al. (1992)
-35.4	139.6	25.5	T	380	16.4362	1278	106	0.114541	28.3679	107.54	0.29734	45.4085	1.52682	21.5927	Cropland	Coarse sand	Walker et al. (1992)
-35.4	139.6	13	T	380	16.4362	1278	106	0.114541	28.3679	107.54	0.29734	45.4085	1.52682	21.5927	Grassland	Clay	Walvoord and Phillips (2004)
31.4	-104.4	0.1	T	365	18.2144	1699	44	1.33405	35.0205	491.9	0.214832	1.40303	1.46394	23.2173	Grassland	Loam	Walvoord and Phillips (2004)
31.4	-104.4	0	T	275	18.2144	1699	44	1.33405	35.0205	491.9	0.16186	1.40303	1.46394	23.2173	Scrubland	Loam	Walvoord and Phillips (2004)
31.4	-104.4	0.05	T	365	18.2144	1699	44	1.33405	35.0205	491.9	0.214832	1.40303	1.46394	23.2173	Scrubland	Loam	Walvoord and Phillips (2004)
37.8	115.8	15.3	T	423	14.4968	1044	75	0.097198	30.1515	839.25	0.405172	89.1346	1.48367	28.9499	Cropland	Clay	Wang et al. (2008)
37.9	115.8	131	T	667	14.4702	1041	75	0.103434	30.1515	879.5	0.64073	87.6963	1.48216	29.2052	Cropland	Clay	Wang et al. (2008)
38.1	114.4	168	T	626	13.7666	1019	79	1.3944	21.4764	369.6	0.614328	64.45	1.44705	29.3893	Cropland	ClayLoam	Wang et al. (2008)
37.4	116.3	198	T	650	14.5733	1079	76	0.144279	25.3343	1017.5	0.60241	107.522	1.49156	29.1928	Cropland	ClayLoam	Wang et al. (2008)
38.3	116.8	256	T	670	14.3567	1059	75	0.106585	20.6071	1121	0.632672	95.3162	1.4529	33.4437	Cropland	ClayCoarse sand	Wang et al. (2008)
37.8	115.8	0	T	544	14.4968	1044	75	0.097198	30.1515	839.25	0.521073	89.1346	1.48367	28.9499	Grassland	Clay	Wang et al. (2008)
37.4	116.3	84.6	T	643	14.5733	1079	76	0.144279	25.3343	1017.5	0.595922	107.522	1.49156	29.1928	Grassland	ClayLoam	Wang et al. (2008)
-30.3	149.3	31.3	T	514	19.7476	1495	67	0.29798	26.1469	620.84	0.343813	38.4452	1.64235	35.7469	Cropland	Clay	Weaver et al. (2005)
-30.3	149.4	56.5	T	460	19.6537	1479	68	0.29488	26.1469	576.82	0.311021	40.6539	1.63719	35.2536	Cropland	Clay	Weaver et al. (2005)
-30.3	149.6	72.5	T	417	19.466	1466	70	0.28868	26.1469	535.14	0.284447	45.5207	1.62413	34.2443	Cropland	Clay	Weaver et al. (2005)
-30.3	149.3	87.3	T	514	19.7476	1495	67	0.29798	26.1469	620.84	0.343813	38.4452	1.64235	35.7469	Cropland	Clay	Weaver et al. (2005)
-30.3	149.3	121	T	514	19.7476	1495	67	0.29798	26.1469	620.84	0.343813	38.4452	1.64235	35.7469	Cropland	Clay	Weaver et al. (2005)
26.3798	-98.82	16	T	795	24.5778	1692.41	50	0.31657	39.4308	606.15	0.293877	21.9202	1.45558	31.5129			West and Broadhurst, 1975
34.3	-117.8	55	T	678	12.9159	1267	38	5.2779	30.4901	518.62	0.535122	286.346	1.42538	24.3125	Grassland	Clay	Williamson et al.(2004)
34.3	-117.8	39	T	678	12.9159	1267	38	5.2779	30.4901	518.62	0.535122	286.346	1.42538	24.3125	Scrubland	Clay	Williamson et al.(2004)
34.64	-101.28	11	T	528.1	15.9555	1640.22	66	1.00032	37.451	669.159	0.316334	5.61348	1.29182	21.8631			Wood and Sanford, 1995
36.1	-111.3	16	T	305	12.6448	1545	54	1.01334	31.0463	387.56	0.197411	11.4832	1.45955	24.0803	Grassland	Fine sand	Zhu (2000)
36.1	-111.3	16	T	305	12.6448	1545	54	1.01334	31.0463	387.56	0.197411	11.4832	1.45955	24.0803	Grassland	Fine sand	Zhu (2000)
34.9	8.1	0.9	T	94	17.7297	1226	61	1.7603	20.2998	220.48	0.0766721	38.8438	1.41893	23.8452	Grassland	Coarse sand	Zouari et al. (2001)
-31.8	115.9	85	WB	775	18.6708	1661	107	0.308016	265.747	323.16	0.466586	170.029	1.24048	14.4404	Scrubland	Coarse sand	Allen (1981)
-34.4	140.1	0.07	WB	270	17.4106	1361	75	0.122545	26.4657	400.24	0.198384	4.46485	1.5492	21.8282	Woodland	Clay	Allison et al. (1990)
-35.1	140.3	0.64	WB	370	16.7466	1346	93	0.113436	46.4103	288.48	0.274889	20.5963	1.52487	19.9815	Woodland	Coarse sand	Allison et al. (1990)
-30.6	116.1	214	WB	703	19.0694	1740	90	0.249212	92.8495	311.82	0.404023	56.4119	1.57549	19.1647	Cropland	Loam	Anderson et al. (1998)
39.92	8.53	318.12	WB	964	16.8545	850	101	1.28214	21.1537	811.41	1.13412	0	1.39979	28.4854			Andreo et al.(2008)
36.68	-6.03	714.45	WB	1299	18.7598	875	97	1.15016	0	548.772	1.48457	0	0.825811	18.795			Andreo et al.(2008)
23.99	-103.02	552.2	WB	1004	18.4483	875	45	1.35762	58.5412	174.911	1.14743	10.6172	1.35312	21.0267			Andreo et al.(2008)
19.32	-99.08	320.4	WB	712	14.5758	925	115	3.93805	90.9033	389.3	0.76973	417.554	1.27127	19.0866			Andreo et al.(2008)
37.47	-4.44	360	WB	800	17.0692	850	108	2.69364	22.6288	981.64	0.941176	132.203	1.45532	30.26			Andreo et al.(2008)
25.73	75.14	430.5	WB	861	26.625	825	31	0.338011	16.0043	555.918	1.04364	173.751	1.54958	30.0737			Andreo et al.(2008)
37.91	-3	244.2	WB	740	15.3598	850	107	3.96378	19.3947	944.965	0.870588	67.4344	1.45608	27.7174			Andreo et al.(2008)
46.98	9.69	117.9	WB	484	4.5028	850	199	10.1552	36.553	715.822	0.569412	1301.66	1.32277	24.9346			Andreo et al.(2008)
35.4	136.9	860	WB	1915	14.1524	895	209	2.80792	45.5513	637.92	2.13966	876.177	1.2354	31.1887	Cropland	Coarse sand	Babiker et al. (2005)
-37.8	142.1	36	WB	695	14.1796	1149	156	0.404129	22.0468	362.04	0.604874	185.744	1.09372	20.3114	Cropland	Loam	Bird et al. (2004)
-37.8	142.1	18	WB	695	14.1796	1149	156	0.404129	22.0468	362.04	0.604874	185.744	1.09372	20.3114	Grassland	Loam	Bird et al. (2004)
19.1667	-99.1667	122.5	WB	1087.8	16.0487	1229.09	113	3.90278	90.9033	325.681	0.887702	473.457	1.29602	21.0521			Birkle et al. 1998
4.81	32.23	2.5	WB	872.6	27.9978	1354.86	107	0.612311	57.8959	724.323	0.716895	228.267	1.51644	35.5977			Bonsor et al.(2009)
53.3	-1.1	69	WB	643	9.72518	449	179	0.361975	29.4384	1030.96	1.43207	342.671	1.48721	29.8711	Woodland	Coarse sand	Calder et al. (2003)
53.3	-1.1	120	WB	643	9.72518	449	179	0.361975	29.4384	1030.96	1.43207	342.671	1.48721	29.8711	Woodland	Coarse sand	Calder et al. (2003)
-31.8	115.9	173	WB	800	18.6708	1661	107	0.308016	265.747	323.16	0.481638	170.029	1.24048	14.4404	Grassland	Coarse sand	Carbon et al. (1982)
43.1	-89.6	256	WB	834	8.0856	824	121	0.717467	46.2589	930.88	1.01214	226.793	1.55089	24.4046	Cropland	ClayFine sand	Dripps and Bradbury (2007)
43.1	-89.6	290	WB	834	8.0856	824	121	0.717467	46.2589	930.88	1.01214	226.793	1.55089	24.4046	Cropland	ClayFine sand	Dripps and Bradbury (2007)
46.1	-89.8	287	WB	790	4.13645	688	128	0.34042	41.407	807.92	1.14826	240.564	1.37794	16.9624	Grassland	Clay	Dripps and Bradbury (2007)
46.1	-89.8	175	WB	790	4.13645	688	128	0.34042	41.407	807.92	1.14826	240.564	1.37794	16.9624	Woodland	Clay	Dripps and Bradbury (2007)
46.1	-89.8	268	WB	790	4.13645	688	128	0.34042	41.407	807.92	1.14826	240.564	1.37794	16.9624	Woodland	Clay	Dripps and Bradbury (2007)
-35.4	147.6	15	WB	611	15.0419	1079	104	0.884808	23.3168	506.49	0.566265	206.62	1.55023	29.33	Cropland	Loam	Dunin et al. (1999)
-35.4	147.6	84	WB	611	15.0419	1079	104	0.884808	23.3168	506.49	0.566265	206.62	1.55023	29.33	Cropland	Loam	Dunin et al. (1999)
-35.4	147.6	89	WB	611	15.0419	1079	104	0.884808	23.3168	506.49	0.566265	206.62	1.55023	29.33	Cropland	Loam	Dunin et al. (1999)
-35.4	147.6	185	WB	611	15.0419	1079	104	0.884808	23.3168	506.49	0.566265	206.62	1.55023	29.33	Cropland	Clay	Dunin et al. (1999)
-35.4	147.6	25	WB	611	15.0419	1079	104	0.884808	23.3168	506.49	0.566265	206.62	1.55023	29.33	Grassland	Clay	Dunin et al. (1999)
-35.4	147.6	2	WB	611	15.0419	1079	104	0.884808	23.3168	506.49	0.566265	206.62	1.55023	29.33	Grassland	Loam	Dunin et al. (1999)
46.6	-119.4	25.4	WB	159	11.5743	1083	86	1.40859	43.4732	729.74	0.146814	19.3477	1.45376	22.9638	Grassland	Clay	Fayer et al. (1996)
-30.8	116.6	53	WB	495	19.1964	1643	83	0.202683	92.8495	242.85	0.301278	37.6314	1.59783	22.0871	Cropland	Fine sand	Fillery and Poulter (2006)
51.6	-1.1	290	WB	587	10.4984	473	152	0.378577	18.271	533.32	1.24101	312.823	1.48713	29.564	Cropland	Clay	Finch (1998)
51.6	-1.1	176	WB	587	10.4984	473	152	0.378577	18.271	533.32	1.24101	312.823	1.48713	29.564	Grassland	Clay	Finch (1998)
51.6	-1.1	96	WB	587	10.4984	473	152	0.378577	18.271	533.32	1.24101	312.823	1.48713	29.564	Woodland	Clay	Finch (1998)
35.11	-106.69	2	WB	195	11.3403	1163	62	1.2974	41.6265	508.871	0.16767	9.52754	1.54745	19.6877			Flint and Flint (2007)
36.56	-116.43	0.9	WB	121	17.9415	1472	35	3.44969	33.9258	489.624	0.0822011	8.46262	1.55795	20.7947			Flint and Flint (2007)
-53.78	-67.7	1.7	WB	243	5.69575	1075	101	0.367593	0	297.072	0.226047	0	0.505214	8.77799			Flint and Flint (2007)
35.05	-118.17	1.9	WB	106	14.7498	1664	38	3.14792	39.1603	479.773	0.0637019	159.637	1.52075	25.8865			Flint and Flint (2007)
32.27	-110.9	4.4	WB	303	20.2037	1470	51	3.12342	25.8905	483	0.206122	6.08439	1.51303	20.8117			Flint and Flint (2007)
35.98	-106.06	17.3	WB	303	8.67631	1011	70	3.19822	41.6265	561.688	0.299703	9.73523	1.51663	24.3604			Flint and Flint (2007)
43.81	-116.74	3.9	WB	294	11.5725	1462	91	0.275642	28.4581	621.171	0.201094	56.5771	1.42896	23.8635			Flint and Flint (2007)
26.1703	32.7238	0.09	WB	19.8	24.284	2233.08	2	1.69251	47.4722	2	0.0101112	0	1.5947	20.3153			Gheith and Sultan (2002)
27.1838	31.185	0.11	WB	12	22.6723	2190.55	2	0.912745	37.9491	2	0.00840142	0	1.46201	23.5542			Gheith and Sultan (2002)
28.3865	30.6294	0.08	WB	1.3	22.3026	1976.42	5	0.638349	35.6779	2	0.00466235	0	1.46258	22.1159			Gheith and Sultan (2002)
31.1207	32.1609	0.24	WB	122	21.0275	535.016	28	0.0648799	0	299.308	0.373634	0	0.580394	4.35643			Gheith and Sultan (2002)
32.1	117.1	6.5	WB	380	16.8025	1469	124	0.213776	13.4796	671	0.258679	313.86	1.55424	33.3814	Cropland	Clay	Gregory et al. (1992)
-7.1	-41.8	14.5	WB	700	28.1965	1835	169	0.459009	60.0396	433.7	0.381471	181.311	1.47768	32.0358	Cropland	Coarse sand	Halm et al. (2002)
-7.1	-41.8	6.5	WB	700	28.1965	1835	169	0.459009	60.0396	433.7	0.381471	181.311	1.47768	32.0358	Scrubland	Coarse sand	Halm et al. (2002)
-35.4	147.6	47.6	WB	650	15.0419	1079	104	0.884808	23.3168	506.49	0.60241	206.62	1.55023	29.33	Grassland	Clay	Heng et al. (2001)
-37.8	140.8	63	WB	600	14.2763	1132	169	0.231301	119.946	593.67	0.530035	0	1.02587	19.2172	Grassland	Coarse sand	Holmes and Colville (1970 )
-37.9	140.9	0	WB	600	14.3288	1147	168	0.198249	119.946	458.28	0.523104	0	0.886104	16.7584	Woodland	Coarse sand	Holmes and Colville (1970)
0.1	30.8	66	WB	869	22.8369	1235	195	1.11682	52.9119	904	0.703644	296.751	1.28572	39.8748	Cropland	Loam	Howard and Karundu (1992)
0.1	30.8	33.5	WB	869	22.8369	1235	195	1.11682	52.9119	904	0.703644	296.751	1.28572	39.8748	Grassland	Loam	Howard and Karundu (1992)
0.1	30.8	81	WB	869	22.8369	1235	195	1.11682	52.9119	904	0.703644	296.751	1.28572	39.8748	No vegetation	Loam	Howard and Karundu (1992)
0.1	30.8	0	WB	869	22.8369	1235	195	1.11682	52.9119	904	0.703644	296.751	1.28572	39.8748	Woodland	Loam	Howard and Karundu (1992)
50.1	10.1	24	WB	521	9.15732	540	179	1.29698	23.4007	485.68	0.964815	209.728	1.41131	28.6436	Cropland	Loam	Jackson and Rushton (1987)
-2.9	-47.6	287	WB	1672	27.7919	1321	270	0.127932	33.8657	445	1.26571	1467.87	1.38272	39.6467	Grassland	Clay	Jipp et al. (1998)
-2.9	-47.6	141	WB	1672	27.7919	1321	270	0.127932	33.8657	445	1.26571	1467.87	1.38272	39.6467	Woodland	Clay	Jipp et al. (1998)
-2.9	-47.6	187	WB	1672	27.7919	1321	270	0.127932	33.8657	445	1.26571	1467.87	1.38272	39.6467	Woodland	Clay	Jipp et al. (1998)
37.9	114.8	66.3	WB	367	14.6136	1031	77	0.155589	22.0805	644.4	0.355965	71.5321	1.46123	29.0679	Cropland	Loam	Kendy et al. (2003)
37.9	114.8	105	WB	367	14.6136	1031	77	0.155589	22.0805	644.4	0.355965	71.5321	1.46123	29.0679	Cropland	Loam	Kendy et al. (2003)
37.9	114.8	140	WB	367	14.6136	1031	77	0.155589	22.0805	644.4	0.355965	71.5321	1.46123	29.0679	Cropland	Loam	Kendy et al. (2003)
37.9	114.8	174	WB	367	14.6136	1031	77	0.155589	22.0805	644.4	0.355965	71.5321	1.46123	29.0679	Cropland	Loam	Kendy et al. (2003)
37.9	114.8	200	WB	461	14.6136	1031	77	0.155589	22.0805	644.4	0.447139	71.5321	1.46123	29.0679	Cropland	Loam	Kendy et al. (2004)
37.9	114.8	690	WB	461	14.6136	1031	77	0.155589	22.0805	644.4	0.447139	71.5321	1.46123	29.0679	Cropland	Loam	Kendy et al. (2004)
37.9	114.8	1300	WB	461	14.6136	1031	77	0.155589	22.0805	644.4	0.447139	71.5321	1.46123	29.0679	Cropland	Loam	Kendy et al. (2004)
-27.4	151.7	270	WB	1068.4	18.9466	1263.39	89	0.393944	21.8529	943.28	0.554142	68.5148	1.61612	41.6444			Kennett-Smith et al. (1994)
-27.4	32.6	179	WB	850	23.3083	1337	90	0.538951	165.938	429.3	0.635752	0	1.43579	20.8247	Woodland	Coarse sand	Kienzle and Schulze (1992)
36.1	140.1	392	WB	1194	14.5501	781	183	0.625395	64.5071	742.88	1.52881	613.05	0.838548	25.8019	Grassland	Loam	Li et al. (2005)
37.68	113.68	68	WB	550	9.80618	1019.09	93	3.05836	20.1486	176.316	0.539696	78.0674	1.42068	31.3548			Lin and Wei (2005)
-33.4	121.9	55.3	WB	522	16.7337	1448	117	0.312924	36.2157	490.9	0.360497	43.2768	1.59935	26.0231	Grassland	Coarse sand	McDowall et al. (2003)
-0.9	30.1	104	WB	1190	20.461	1126	196	2.73682	71.0071	524.6	1.05684	242.854	1.24096	40.0174	Cropland	Clay	Milroy et al. (2008)
24.8	88.6	153	WB	1442	26.8178	1195	70	0.105878	28.3346	524.79	1.20669	823.485	1.47543	27.2268	Cropland	Clay	Monirul Islam and Kanungoe (2005)
47.6	-93.4	109	WB	784	4.4653	725	130	0.238656	129.823	737.57	1.08138	145.655	1.32227	18.0108	Woodland	Loam	Nichols and Verry (2001)
-32.4	116.8	0.82	WB	490	17.1454	1468	102	0.166766	141.936	506.82	0.333787	127.968	1.57543	23.7637	Woodland	Coarse sand	Peck and Hurle(1973)
-33.1	116.9	1.2	WB	500	16.5816	1373	115	0.161811	146.513	540	0.364166	141.566	1.58098	24.8341	Woodland	Coarse sand	Peck and Hurle(1973)
-33.3	116.6	1.7	WB	820	16.4564	1396	123	0.25251	146.513	543	0.587393	203.163	1.56697	22.2852	Woodland	Coarse sand	Peck and Hurle(1973)
-32.8	116.8	1.9	WB	730	16.6872	1434	111	0.137691	141.936	527.5	0.509066	149.296	1.57504	23.6832	Woodland	Coarse sand	Peck and Hurle(1973)
-31.8	116.3	3.9	WB	880	17.8967	1597	101	0.549389	85.8185	465.72	0.551033	161.142	1.45665	21.1247	Woodland	Coarse sand	Peck and Hurle(1973)
-31.4	116.1	8	WB	910	18.5431	1647	99	0.384087	85.8185	420.78	0.55252	117.564	1.53337	19.9072	Woodland	Coarse sand	Peck and Hurle(1973)
52.3	0.3	91	WB	550	10.3391	481	156	0.119371	92.6861	933.72	1.14345	245.974	1.4292	27.8542	Grassland		Radford et al. (2009)
52.3	-2.6	68	WB	625	9.85124	444	168	0.736784	51.378	944.1	1.40766	381.034	1.50486	26.5225	Grassland	Fine sand	Ragab et al. (1997)
50.8	-3.3	153	WB	738	10.6079	477	168	0.600322	15.1723	584.14	1.54717	556.337	1.24792	24.7305	Grassland	Fine sand	Ragab et al. (1997)
51.1	-1.3	213	WB	771	10.5787	469	147	0.394863	18.271	226.44	1.64392	413.222	0.896064	17.7761	Grassland	ClayLoam	Ragab et al. (1997)
-36.1	146.6	74.5	WB	693	15.6435	1056	108	0.990397	21.0378	598.8	0.65625	197.517	1.56742	29.6344	Grassland	Clay	Ridley et al. (1997)
-36.1	146.6	83	WB	693	15.6435	1056	108	0.990397	21.0378	598.8	0.65625	197.517	1.56742	29.6344	Grassland	Clay	Ridley et al. (1997)
-36.1	146.6	83	WB	693	15.6435	1056	108	0.990397	21.0378	598.8	0.65625	197.517	1.56742	29.6344	No vegetation	Clay	Ridley et al. (1997)
-36.1	146.6	142	WB	693	15.6435	1056	108	0.990397	21.0378	598.8	0.65625	197.517	1.56742	29.6344	No vegetation	Clay	Ridley et al. (1997)
-36.1	146.6	36.5	WB	600	15.6435	1056	108	0.990397	21.0378	598.8	0.568182	197.517	1.56742	29.6344	Cropland	Loam	Ridley et al. (1997)
-36.1	146.6	5.5	WB	600	15.6435	1056	108	0.990397	21.0378	598.8	0.568182	197.517	1.56742	29.6344	Grassland	Loam	Ridley et al. (1997)
51.1	-1.3	207	WB	986	10.5787	469	147	0.394863	18.271	226.44	2.10235	413.222	0.896064	17.7761	Grassland	ClayLoam	Roberts and Rosier (2006)
51.1	-1.3	300	WB	1004	10.5787	469	147	0.394863	18.271	226.44	2.14072	413.222	0.896064	17.7761	Woodland	ClayLoam	Roberts and Rosier (2006)
12.2112	9.09668	105.7	WB	526.8	28.0211	2156.72	49	0.17595	90.5061	700.749	0.332114	185.933	1.52186	17.7513			Sandström (1995)
26.91	75.79	77.5	WB	600	26.0363	1762.81	35	0.422966	32.2436	493.734	0.340366	151.005	1.53105	24.0541			Scanlon et al.(2010)
-0.1	34.8	55	WB	1278	22.9866	1702	199	1.20213	0	896.8	0.750881	386.981	0.68446	22.8406	Grassland	Clay	Singh et al. (1984)
-33.9	121.8	35	WB	500	12.2648	1410	95	0.147798	36.2157	319.02	0.35461	0	0.961686	15.7244	Grassland	Coarse sand	Smettem (1998)
38.1	-98.8	65	WB	600	13.6678	1330	84	0.170712	30.8545	571.64	0.451128	37.7163	1.34178	25.1318	Cropland	ClayLoam	Sophocleous and McAllister (1987)
38.1	-98.8	103	WB	600	13.6678	1330	84	0.170712	30.8545	571.64	0.451128	37.7163	1.34178	25.1318	Cropland	Coarse sand	Sophocleous and McAllister (1987)
38.1	-98.8	1.6	WB	600	13.6678	1330	84	0.170712	30.8545	571.64	0.451128	37.7163	1.34178	25.1318	Grassland	ClayLoam	Sophocleous and McAllister (1987)
38.1	-98.8	42	WB	600	13.6678	1330	84	0.170712	30.8545	571.64	0.451128	37.7163	1.34178	25.1318	Grassland	Coarse sand	Sophocleous and McAllister (1987)
48.3	-122.6	89.8	WB	618	10.6599	643	157	1.0854	40.2928	834.44	0.96112	0	1.09307	19.2248	Woodland	Clay	Sumioka and Bauer (2004)
-33.92	150.92	186	WB	738	17.521	1071.72	125	0.670112	21.3272	323.675	0.688615	0	1.19666	25.2426			Sun and Cornish (2005)
-35.1	139.3	1	WB	300	16.5496	1306	105	0.34531	28.3679	152.32	0.229709	47.8351	1.35383	19.8327	Cropland	Coarse sand	Unkovich et al. (2003)
-35.1	141.9	2.5	WB	330	17.0785	1373	76	0.059607	41.5543	196.88	0.24035	9.07256	1.52671	19.5999	Cropland	Clay	Unkovich et al. (2003)
-36.6	143.9	58.8	WB	425	15.3773	1241	96	0.352541	13.3394	683.28	0.342466	73.573	1.61667	31.6011	Cropland	ClayLoam	Unkovich et al. (2003)
-36.6	143.9	0.02	WB	425	15.3773	1241	96	0.352541	13.3394	683.28	0.342466	73.573	1.61667	31.6011	Woodland	ClayLoam	Unkovich et al. (2003)
-33.6	18.4	95	WB	350	17.6289	1236	91	1.09236	213.4	358.02	0.283172	0	1.32443	12.1286	Scrubland	Coarse sand	Vandoolaeghe (1982)
-33.6	18.4	98.8	WB	380	17.6289	1236	91	1.09236	213.4	358.02	0.307443	0	1.32443	12.1286	Scrubland	Coarse sand	Vandoolaeghe and Bertram (1982)
37.45	104.95	48	WB	268.6	8.56866	907.2	65	1.56422	20.3228	283.23	0.275999	2.04035	1.65287	24.9933			Wang et al. 2004
-33.8	117.4	17	WB	483	15.9528	1286	128	0.133839	15.8554	483.9	0.375583	93.7541	1.56807	26.6332	Grassland	Fine sand	Ward et al. (2002)
-33.8	117.4	45	WB	483	15.9528	1286	128	0.133839	15.8554	483.9	0.375583	93.7541	1.56807	26.6332	Grassland	Fine sand	Ward et al. (2002)
27.6	-98.3	0	WB	887	23.2535	1493	65	0.241615	31.3823	562.5	0.594106	42.5869	1.4706	32.6421	Woodland	Loam	Weltz and Blackburn (1995)
-35.4	147.6	22	WB	650	15.0419	1079	104	0.884808	23.3168	506.49	0.60241	206.62	1.55023	29.33	Grassland	Coarse sand	White (1997)
-35.4	147.6	62	WB	697	15.0419	1079	104	0.884808	23.3168	506.49	0.645968	206.62	1.55023	29.33	Grassland	Coarse sand	White (1997)
-35.1	147.4	44.5	WB	593	15.8599	1134	98	0.57112	23.3168	623.56	0.522928	129.96	1.57788	27.0315	Grassland	Clay	White et al. (2003)
-30.6	150.6	47.5	WB	662	17.7341	1275	84	1.251	86.2532	499.69	0.519216	100.895	1.54777	28.5666	Grassland	Loam	White et al. (2003)
-37.4	141.9	142	WB	642	14.0887	1160	143	0.602089	74.7359	394.96	0.553448	165.92	1.5663	29.9652	Grassland	Clay	White et al. (2003)
-33.6	149.1	159	WB	885	14.281	1136	95	1.14541	27.2207	780	0.779049	192.623	1.49884	31.701	Grassland	Clay	White et al. (2003)
-34.9	117.8	161	WB	758	15.5039	1190	161	0.397943	182.143	207.72	0.636975	0	0.91143	12.0329	Grassland	Coarse sand	White et al. (2003)
-37.1	145.9	161	WB	813	12.9532	1066	142	2.26808	23.9323	554.16	0.762664	499.802	1.49708	30.2953	Grassland	Fine sand	White et al. (2003)
-31.4	150.8	21	WB	752	17.0363	1226	95	1.65158	17.9985	1029.03	0.613377	130.967	1.55606	38.7427	Woodland	Coarse sand	Zeppel et al. (2006)
33.3	-99.3	7	L	671	18.4155	1610	69	0.401571	59.0779	932.08	0.41677	44.8916	1.36812	20.4058	Grassland	Loam	Carlson et al. (1988)
33.3	-99.3	9.3	L	671	18.4155	1610	69	0.401571	59.0779	932.08	0.41677	44.8916	1.36812	20.4058	No vegetation	Loam	Carlson et al. (1988)
33.3	-99.3	3.3	L	671	18.4155	1610	69	0.401571	59.0779	932.08	0.41677	44.8916	1.36812	20.4058	Woodland	Loam	Carlson et al. (1988)
49.3	14.8	20.6	L	528	8.65892	599	165	0.919998	19.1298	599.6	0.881469	149.5	1.3913	27.6479	Grassland	Clay	Duffková (2002)
46.6	-119.4	55.4	L	159	11.5743	1083	86	1.40859	43.4732	729.74	0.146814	19.3477	1.45376	22.9638	No vegetation	Coarse sand	Fayer et al. (1996)
46.6	-119.4	86.7	L	184	11.5743	1083	86	1.40859	43.4732	729.74	0.169898	19.3477	1.45376	22.9638	No vegetation	ClayFine sand	Fayer et al. (1996)
46.6	-119.4	300	L	480	11.5743	1083	86	1.40859	43.4732	729.74	0.443213	19.3477	1.45376	22.9638	No vegetation	ClayFine sand	Fayer et al. (1996)
-37.8	140.8	120	L	700	14.2763	1132	169	0.231301	119.946	593.67	0.618375	0	1.02587	19.2172	Grassland	Coarse sand	Holmes and Colville (1968)
29.1	-99.9	0	L	273	23.0493	1565	57	0.426375	11.3542	620.28	0.174441	9.76306	1.41965	32.3509	Grassland	Loam	Holmstead et al. (1988)
29.1	-99.9	1.2	L	736	23.0493	1565	57	0.426375	11.3542	620.28	0.470288	9.76306	1.41965	32.3509	Grassland	Loam	Holmstead et al. (1988)
29.1	-99.9	10.7	L	273	23.0493	1565	57	0.426375	11.3542	620.28	0.174441	9.76306	1.41965	32.3509	No vegetation	Loam	Holmstead et al. (1988)
29.1	-99.9	29.9	L	736	23.0493	1565	57	0.426375	11.3542	620.28	0.470288	9.76306	1.41965	32.3509	No vegetation	Loam	Holmstead et al. (1988)
33.3	-99.3	0	L	723	18.4155	1610	69	0.401571	59.0779	932.08	0.449068	44.8916	1.36812	20.4058	Grassland	Loam	Julien et al. (1988)
33.3	-99.3	0	L	811	18.4155	1610	69	0.401571	59.0779	932.08	0.503727	44.8916	1.36812	20.4058	Grassland	Loam	Julien et al. (1988)
33.3	-99.3	0	L	852	18.4155	1610	69	0.401571	59.0779	932.08	0.529193	44.8916	1.36812	20.4058	Grassland	Loam	Julien et al. (1988)
33.3	-99.3	10.8	L	837	18.4155	1610	69	0.401571	59.0779	932.08	0.519876	44.8916	1.36812	20.4058	No vegetation	Loam	Julien et al. (1988)
33.3	-99.3	0	L	678	18.4155	1610	69	0.401571	59.0779	932.08	0.421118	44.8916	1.36812	20.4058	Woodland	Loam	Julien et al. (1988)
52.6	13.4	285	L	620	9.96459	593	165	0.189635	33.5792	620	1.04553	158.755	1.30685	24.6803	Grassland	Coarse sand	Müller and Bolte (2009)
52.6	13.4	74.4	L	620	9.96459	593	165	0.189635	33.5792	620	1.04553	158.755	1.30685	24.6803	Woodland	Coarse sand	Müller and Bolte (2009)
52.6	13.4	80.6	L	620	9.96459	593	165	0.189635	33.5792	620	1.04553	158.755	1.30685	24.6803	Woodland	Coarse sand	Müller and Bolte (2009)
52.6	13.4	124	L	620	9.96459	593	165	0.189635	33.5792	620	1.04553	158.755	1.30685	24.6803	Woodland	Coarse sand	Müller and Bolte (2009)
-35.1	141.9	5.3	L	356	17.0785	1373	76	0.059607	41.5543	196.88	0.259286	9.07256	1.52671	19.5999	Cropland	Clay	O’Connell et al. (2003)
-37.8	140.8	129	L	750	14.2763	1132	169	0.231301	119.946	593.67	0.662544	0	1.02587	19.2172	Cropland	ClayFine sand	Pakrou and Dillon (2000)
-37.8	140.8	163	L	750	14.2763	1132	169	0.231301	119.946	593.67	0.662544	0	1.02587	19.2172	Cropland	ClayFine sand	Pakrou and Dillon (2000)
52.3	0.3	165	L	550	10.3391	481	156	0.119371	92.6861	933.72	1.14345	245.974	1.4292	27.8542	Grassland		Radford et al. (2009)
-43.6	172.1	17	L	625	11.1565	686	118	1.53143	17.9269	387.18	0.911079	216.635	1.15708	23.4165	Woodland	ClayFine sand	Watson et al. (2004)
52.4	13.3	269	L	545	10.1138	601	164	0.191885	33.5792	579.2	0.906822	152.03	1.27263	25.1116	Grassland	Coarse sand	Wegehenk et al.(2008)
27.6	-98.3	22	L	887	23.2535	1493	65	0.241615	31.3823	562.5	0.594106	42.5869	1.4706	32.6421	Grassland	Loam	Weltz and Blackburn (1995)
27.6	-98.3	78	L	887	23.2535	1493	65	0.241615	31.3823	562.5	0.594106	42.5869	1.4706	32.6421	No vegetation	Loam	Weltz and Blackburn (1995)
33.3	-98.3	0.13	L	679	18.4399	1610	75	0.481732	68.8083	549.36	0.421739	86.72	1.41307	25.4776	Grassland	Loam	Wright et al. (1988)
6.43	51.18	279.5	L	785.833	0	532.4	0	0	0	0	1.47602	0	0	0			Xu and Chen, 2005
11.1	32.6	0.9	M	400	29.3418	1930	55	0.051549	12.1286	690.84	0.343275	127.909	1.66417	47.5698	Scrubland	Coarse sand	Abdalla (2008)
11.1	29.1	4	M	1025	29.4043	1893	61	0.690892	16.6188	398.96	0.541469	126.946	1.60212	24.781	Scrubland	Clay	Abdalla (2008)
16.1	34.6	7.3	M	130	29.9114	2102	19	0.112235	36.7729	63.66	0.0618459	2.54668	1.66659	39.6136	Scrubland	Coarse sand	Abdalla (2008)
35	-106.75	8.5	M	358.9	11.4409	1445.56	62	1.0623	41.6265	508.625	0.259484	9.83529	1.54752	19.6045			Anderholm 2001
46.98	9.69	116	M	484	4.5028	850	199	10.1552	36.553	715.822	0.569412	1301.66	1.32277	24.9346			Andreo et al.(2008)
13.1	78.3	84	M	902	26.3738	1530	52	0.903872	13.344	436.2	0.589542	164.166	1.55206	40.8524	Cropland	Clay	Anuraga et al. (2006)
12.9	78.3	90	M	902	26.6599	1529	51	1.06097	13.8902	549.8	0.589928	175.755	1.553	40.9117	Cropland	Clay	Anuraga et al. (2006)
13.1	78.3	124	M	902	26.3738	1530	52	0.903872	13.344	436.2	0.589542	164.166	1.55206	40.8524	Cropland	Clay	Anuraga et al. (2006)
13.1	78.3	184	M	902	26.3738	1530	52	0.903872	13.344	436.2	0.589542	164.166	1.55206	40.8524	Cropland	Clay	Anuraga et al. (2006)
13.1	78.3	220	M	902	26.3738	1530	52	0.903872	13.344	436.2	0.589542	164.166	1.55206	40.8524	Cropland	Clay	Anuraga et al. (2006)
13.1	78.3	232	M	902	26.3738	1530	52	0.903872	13.344	436.2	0.589542	164.166	1.55206	40.8524	Cropland	Clay	Anuraga et al. (2006)
38.3	-0.6	61.5	M	454	18.2791	1136	78	1.4426	16.4728	829.84	0.399648	0	1.21139	22.246	Grassland	Loam	Bellot et al. (1999)
38.3	-0.6	125	M	454	18.2791	1136	78	1.4426	16.4728	829.84	0.399648	0	1.21139	22.246	No vegetation	Loam	Bellot et al. (1999)
38.3	-0.6	18.6	M	454	18.2791	1136	78	1.4426	16.4728	829.84	0.399648	0	1.21139	22.246	Scrubland	Loam	Bellot et al. (1999)
38.3	-0.6	9.6	M	454	18.2791	1136	78	1.4426	16.4728	829.84	0.399648	0	1.21139	22.246	Woodland	Loam	Bellot et al. (1999)
42.4	-72.3	262	M	1248	9.32442	855	135	1.42691	108.964	467	1.45965	476.455	1.28733	7.99441	Woodland	Loam	Bent (2001)
42.4	-72.3	371	M	1169	9.32442	855	135	1.42691	108.964	467	1.36725	476.455	1.28733	7.99441	Woodland	Loam	Bent (2001)
-37.3	144.9	113	M	651	13.8147	1121	134	1.0333	15.151	604.48	0.580731	255.88	1.57558	33.5291	Grassland	Coarse sand	Beverly et al. (2005)
-33.6	18.4	73.5	M	350	17.6289	1236	91	1.09236	213.4	358.02	0.283172	0	1.32443	12.1286	Scrubland	Coarse sand	Bredenkamp et al. (1993)
53.3	-1.1	169	M	800	9.72518	449	179	0.361975	29.4384	1030.96	1.78174	342.671	1.48721	29.8711	Grassland	Coarse sand	Calder et al. (2003)
53.3	-1.1	156	M	800	9.72518	449	179	0.361975	29.4384	1030.96	1.78174	342.671	1.48721	29.8711	Scrubland	Coarse sand	Calder et al. (2003)
53.3	-1.1	45.8	M	643	9.72518	449	179	0.361975	29.4384	1030.96	1.43207	342.671	1.48721	29.8711	Woodland	Coarse sand	Calder et al. (2003)
53.3	-1.1	106	M	643	9.72518	449	179	0.361975	29.4384	1030.96	1.43207	342.671	1.48721	29.8711	Woodland	Coarse sand	Calder et al. (2003)
13.3295	10.8064	60	M	364.4	29.2863	2447	33	0.108983	176.764	787.801	0.150777	16.3987	1.51203	20.4603			Carter (1994)
37.3	-80.1	27	M	1045	12.6536	982	135	2.93096	22.503	658	1.06415	307.271	1.41425	28.759	Woodland		Cho et al. (2009)
35	-79	2.3	M	1218	16.8157	1139.25	112	0.249875	36.3308	622.25	1.06912	301.049	1.4285	30.8313			Coes et al. (2006)
-34.3	140.6	4.9	M	260	17.65	1373	68	0.127147	26.4657	500.32	0.189366	2.38229	1.54592	21.1204	Grassland	Coarse sand	Cook et al. (2004)
51.3	4.8	292	M	839	10.8085	577	191	0.073387	194.363	672.88	1.45407	362.482	1.31396	16.4275	Cropland	Coarse sand	Dams et al. (2008)
-29.9	116.6	30	M	335	19.8731	1732	74	0.204015	109.291	384.96	0.193418	18.3935	1.58813	18.9216	Cropland	Coarse sand	Dolling et al. (2007)
-33.9	117.1	115	M	496	15.9273	1295	134	0.236193	15.8554	541.6	0.383012	129.867	1.55637	24.0891	Cropland	Coarse sand	Dolling et al. (2007)
-19.39	19.56	14	M	382.6	23.4429	1484.33	69	0.174899	220.073	630.3	0.272866	26.2557	1.61076	13.6356			Eilers et al. (2007)
45.1	9.6	491	M	800	12.928	678	133	1.45489	16.7952	897.76	1.17994	428.327	1.48921	24.8374	Grassland	Coarse sand	Facchi et al. (2005)
13.6	2.8	2	M	557	30.4001	2160	51	0.385007	204.644	626	0.25787	49.1102	1.5752	8.29827	Scrubland	Coarse sand	Favreau et al. (2009)
46.5	-119.5	11	M	201.4	11.5884	1125.24	85	1.65467	43.4732	758	0.163047	20.9346	1.4715	22.6253			Fayer 1996
-35.4	147.6	3	M	611	15.0419	1079	104	0.884808	23.3168	506.49	0.566265	206.62	1.55023	29.33	Grassland	Clay	Hatton and Nulsen (1999)
-35.4	147.6	134	M	611	15.0419	1079	104	0.884808	23.3168	506.49	0.566265	206.62	1.55023	29.33	Grassland	Clay	Hatton and Nulsen (1999)
-35.4	147.6	0	M	611	15.0419	1079	104	0.884808	23.3168	506.49	0.566265	206.62	1.55023	29.33	Woodland	Clay	Hatton and Nulsen (1999)
35.3	107.8	18.3	M	545	11.0061	818	104	2.52739	13.815	978.72	0.666259	78.0418	1.53131	27.9052	Cropland	ClayLoam	Huang and Gallichand (2006)
13.395	10.871	0.9	M	364.4	29.2749	2459.39	32	0.10731	176.764	799.804	0.146648	14.3329	1.51013	20.7808			IWACO (1985)
-20.2699	30.91	1	M	805.1	21.1036	1321.93	73	2.27494	42.4742	976	0.457976	107.494	1.54246	33.5872			Klock (2001)
-19.08	14.58	15.6	M	67.9	19.4551	1327.68	46	1.00327	31.4965	216.825	0.201013	6.86487	1.65784	22.8106			Klock et al.(2001)
51.8	13.6	82	M	652	10.2263	616	165	0.250322	37.2656	567.5	1.05844	128.529	1.32361	25.0689	Woodland	Coarse sand	Knoche et al. (2002)
-29.6	115.8	25.1	M	324	19.4638	1969	83	0.359362	119.265	540.12	0.164551	35.7458	1.56266	18.2226	Cropland	Coarse sand	Milroy et al. (2008)
-29.6	115.8	37.9	M	356	19.4638	1900	83	0.359362	119.265	540.12	0.187368	35.7458	1.56266	18.2226	Cropland	Coarse sand	Milroy et al. (2008)
-29.6	115.8	40.6	M	387	19.4638	1800	83	0.359362	119.265	540.12	0.215	35.7458	1.56266	18.2226	Cropland	Coarse sand	Milroy et al. (2008)
-29.6	115.8	45	M	339	19.4638	1969	83	0.359362	119.265	540.12	0.172169	35.7458	1.56266	18.2226	Cropland	Coarse sand	Milroy et al. (2008)
-29.6	115.8	54.3	M	409	19.4638	1700	83	0.359362	119.265	540.12	0.240588	35.7458	1.56266	18.2226	Cropland	Coarse sand	Milroy et al. (2008)
-29.6	115.8	83.1	M	461	19.4638	1622	83	0.359362	119.265	540.12	0.284217	35.7458	1.56266	18.2226	Cropland	Coarse sand	Monirul Islam and Kanungoe (2005)
40.8175	111.77	15	M	414	6.45582	1010.4	75	1.73463	24.6562	611.067	0.335258	18.079	1.32694	24.5953			Ó Dochartaigh and MacDonald, 2005)
-35.8	146.8	93.8	M	546	15.9189	1071	103	0.593638	17.8211	664	0.509804	166.287	1.57932	29.0325	Cropland	Loam	Paydar and Gallant (2008)
-35.8	146.8	17.6	M	546	15.9189	1071	103	0.593638	17.8211	664	0.509804	166.287	1.57932	29.0325	Grassland	Loam	Paydar and Gallant (2008)
-31.3	117.6	12	M	336	18.7109	1541	76	0.17203	24.652	105.72	0.21804	21.7456	1.60895	26.8449	Cropland	Fine sand	Pracilio et al. (2003)
-31.3	117.6	32	M	336	18.7109	1541	76	0.17203	24.652	105.72	0.21804	21.7456	1.60895	26.8449	Cropland	Fine sand	Pracilio et al. (2003)
-31.3	117.6	53	M	336	18.7109	1541	76	0.17203	24.652	105.72	0.21804	21.7456	1.60895	26.8449	Cropland	Coarse sand	Pracilio et al. (2003)
31.8	-110.8	0.2	M	303	17.373	1499	59	2.65648	28.6226	545	0.202135	15.7399	1.47608	21.2029	Scrubland	Loam	Renard et al. (1993)
-34.4	135.9	10	M	550	16.7957	1408	116	0.268864	0	332.98	0.390625	0	0.154808	1.86562	Grassland	Coarse sand	Richardson and Narayan (1995)
-36.1	146.6	51.5	M	600	15.6435	1056	108	0.990397	21.0378	598.8	0.568182	197.517	1.56742	29.6344	Cropland	Loam	Ridley et al. (1997)
-36.1	146.6	6.8	M	600	15.6435	1056	108	0.990397	21.0378	598.8	0.568182	197.517	1.56742	29.6344	Grassland	Loam	Ridley et al. (1997)
-32.8	26.1	5.8	M	460	17.694	1342	86	3.5309	35.2301	469.2	0.342772	18.479	1.50586	22.1035	Grassland	Loam	Sami and Hughes (1996)
27.47	70.62	90	M	165	26.6501	1790.37	13	0.216959	95.214	2	0.0921599	0	1.5518	11.313			Scanlon et al.(2010)
-18.53	27.55	18.5	M	555	23.1775	2000	69	0.517154	107.95	808.969	0.2775	133.422	1.56623	24.8412			Sibanda et al. (2009)
-35.4	147.6	216	M	674	15.0419	1079	104	0.884808	23.3168	506.49	0.624652	206.62	1.55023	29.33	Woodland	Loam	Snow et al. (1999)
34.3	-102.8	7	M	408	15.5472	1596	62	0.244898	24.4735	548.24	0.255639	5.45332	1.37178	20.4842	Cropland	Loam	Sophocleous (2005)
38.9	-101.8	15	M	465	11.4093	1274	81	0.367264	78.9016	543.9	0.364992	5.07485	1.38234	17.8408	Cropland	Loam	Sophocleous (2005)
40.6	-102.3	29.5	M	448	11.0937	1201	87	0.32109	110.733	596.32	0.373022	3.13718	1.40954	14.8424	Cropland	Loam	Sophocleous (2005)
40.6	-102.3	49.5	M	448	11.0937	1201	87	0.32109	110.733	596.32	0.373022	3.13718	1.40954	14.8424	Cropland	ClayFine sand	Sophocleous (2005)
38.1	-101.3	91	M	623	12.3138	1376	78	0.248888	78.9016	551.72	0.452762	5.16591	1.38278	17.2119	Cropland	Loam	Sophocleous (2005)
47.9	-97.1	102	M	464	5.04195	809	105	0.101839	10.6177	553.6	0.573548	73.7028	1.31088	28.8835	Cropland	Loam	Sophocleous (2005)
40.6	-98.1	109	M	668	11.2464	1138	93	0.172571	34.8802	562.56	0.586995	66.6009	1.24102	23.8466	Cropland	Loam	Sophocleous (2005)
34.3	-102.8	0	M	408	15.5472	1596	62	0.244898	24.4735	548.24	0.255639	5.45332	1.37178	20.4842	Grassland	Loam	Sophocleous (2005)
40.6	102.3	1	M	448	8.9269	1201	30	0.848469	11.5282	6.06	0.373022	0.00764706	1.59068	2.02116	Grassland	Loam	Sophocleous (2005)
40.6	-102.3	2	M	448	11.0937	1201	87	0.32109	110.733	596.32	0.373022	3.13718	1.40954	14.8424	Grassland	ClayFine sand	Sophocleous (2005)
38.9	-101.8	8	M	465	11.4093	1274	81	0.367264	78.9016	543.9	0.364992	5.07485	1.38234	17.8408	Grassland	Loam	Sophocleous (2005)
38.1	-101.3	19	M	623	12.3138	1376	78	0.248888	78.9016	551.72	0.452762	5.16591	1.38278	17.2119	Grassland	Loam	Sophocleous (2005)
47.9	-97.1	40	M	464	5.04195	809	105	0.101839	10.6177	553.6	0.573548	73.7028	1.31088	28.8835	Grassland	Loam	Sophocleous (2005)
40.6	-98.1	92	M	668	11.2464	1138	93	0.172571	34.8802	562.56	0.586995	66.6009	1.24102	23.8466	Grassland	Loam	Sophocleous (2005)
48.3	-122.6	116	M	618	10.6599	643	157	1.0854	40.2928	834.44	0.96112	0	1.09307	19.2248	Woodland	Coarse sand	Sumioka and Bauer (2004)
51.1	5.8	293	M	905	10.8329	547	198	0.36652	207.605	766.64	1.65448	317.599	1.36626	20.9315	Grassland	Coarse sand	van Lanen and Dijksma (1999)
-22.6	18.3	7.6	M	409	21.0146	1542	61	0.638619	103.694	525.52	0.26524	12.0627	1.5354	23.5468	Grassland	Clay	Wanke et al. (2008)
-22.6	18.3	75.3	M	409	21.0146	1542	61	0.638619	103.694	525.52	0.26524	12.0627	1.5354	23.5468	No vegetation	Loam	Wanke et al. (2008)
-22.6	18.3	7	M	409	21.0146	1542	61	0.638619	103.694	525.52	0.26524	12.0627	1.5354	23.5468	Scrubland	Coarse sand	Wanke et al. (2008)
39.1	-75.4	159	M	1150	13.8546	1020	120	0.054104	18.841	616.08	1.12745	278.988	1.38799	26.8427	Cropland	ClayFine sand	Webb et al. (2008)
52.6	13.4	114	M	534	9.96459	593	165	0.189635	33.5792	620	0.900506	158.755	1.30685	24.6803	Cropland	Coarse sand	Wechsung et al. (2000)
52.6	13.4	28.9	M	534	9.96459	593	165	0.189635	33.5792	620	0.900506	158.755	1.30685	24.6803	Woodland	Coarse sand	Wechsung et al. (2000)
-33.4	145.6	8.5	M	564	18.4354	1400	63	0.192711	44.9291	266.18	0.402857	14.2616	1.62504	25.3966	Cropland	Clay	Zhang et al. (1999)
-35.1	142.1	9.5	M	351	17.1331	1379	74	0.057163	28.1593	238.72	0.254532	9.18041	1.52875	19.8093	Grassland	Clay	Zhang et al. (1999)
36	-110.583	16	M	279.5	11.3587	1507.47	58	1.32089	28.1542	232.241	0.174605	11.0687	1.48437	22.6799			Zhu 2000
32.98	-80.03	148	BF	944	19.08	902.097	111	0.0651047	0	424.992	1.04645	0	0.693483	15.4491			Arnold et al. (2000)
43.3	-88.3	123	BF	1030	8.4673	839	125	0.412091	11.8316	728	1.22765	190.275	1.27406	20.2828	Cropland	Coarse sand	Cherkauer and Ansari (2005)
-14.4	28.4	281	BF	937	22.322	1448	77	0.536841	24.0457	912.88	0.647099	406.318	1.34511	43.4083	No vegetation	Clay	Houston (1982)
-14.4	28.4	80	BF	937	22.322	1448	77	0.536841	24.0457	912.88	0.647099	406.318	1.34511	43.4083	Woodland	Clay	Houston (1982)
-32.4	116.8	24	BF	490	17.1454	1468	102	0.166766	141.936	506.82	0.333787	127.968	1.57543	23.7637	Grassland	Coarse sand	Peck and Hurle(1973)
-32.8	116.8	26	BF	730	16.6872	1434	111	0.137691	141.936	527.5	0.509066	149.296	1.57504	23.6832	Grassland	Coarse sand	Peck and Hurle(1973)
-33.1	116.9	37	BF	500	16.5816	1373	115	0.161811	146.513	540	0.364166	141.566	1.58098	24.8341	Grassland	Coarse sand	Peck and Hurle(1973)
-33.3	116.6	60	BF	820	16.4564	1396	123	0.25251	146.513	543	0.587393	203.163	1.56697	22.2852	Grassland	Coarse sand	Peck and Hurle(1973)
-31.8	116.3	61	BF	880	17.8967	1597	101	0.549389	85.8185	465.72	0.551033	161.142	1.45665	21.1247	Grassland	Coarse sand	Peck and Hurle(1973)
-31.4	116.1	78	BF	910	18.5431	1647	99	0.384087	85.8185	420.78	0.55252	117.564	1.53337	19.9072	Grassland	Coarse sand	Peck and Hurle(1973)
-19.08	14.58	267.5	BF	400	19.4551	1327.68	46	1.00327	31.4965	216.825	0.301278	6.86487	1.65784	22.8106			Selaolo et al. (1996)
-3.1	-60.1	438	BF	2627	28.3899	1299	247	0.050302	20.8855	419.8	2.02232	1317.14	1.36628	37.9143	Woodland	Clay	Tomasella et al. (2008)
-31.8	115.9	121	Mixed	900	18.6708	1661	107	0.308016	265.747	323.16	0.541842	170.029	1.24048	14.4404	Woodland	Coarse sand	Carbon et al. (1982)
-23.0393	23.0273	3	Mixed	391.3	22.9077	1453.85	49	0.112623	221.716	624.218	0.224474	3.5909	1.6116	13.593			De Vries et al. (2000)
46.3	-119.9	119	Mixed	187	11.1344	1068	83	2.08136	43.4732	747.88	0.175094	29.6096	1.38568	22.0549	Cropland	ClayLoam	Fisher and Healy (2008)
39.3	-76.1	315	Mixed	981	13.4279	1045	122	0.191572	20.4056	652.72	0.938756	294.293	1.42966	29.3041	Cropland	Loam	Fisher and Healy (2008)
37.3	-120.8	423	Mixed	270	16.5562	1384	51	0.435889	20.3408	483.78	0.195087	100.028	1.50235	31.9582	Cropland	Coarse sand	Fisher and Healy (2008)
39.8	-85.8	475	Mixed	906	11.593	955	131	0.154872	13.0448	910	0.948691	391.518	1.53751	28.3431	Cropland	ClayLoam	Fisher and Healy (2008)
46.6	-119.4	71.1	Mixed	172	11.5743	1083	86	1.40859	43.4732	729.74	0.158818	19.3477	1.45376	22.9638	No vegetation	Coarse sand	Gee et al. (1993)
46.6	-119.4	300	Mixed	480	11.5743	1083	86	1.40859	43.4732	729.74	0.443213	19.3477	1.45376	22.9638	No vegetation	Coarse sand	Gee et al. (1993)
32.6	-106.4	87	Mixed	338	16.4997	1704	48	0.995781	69.6716	601.75	0.198357	2.27168	1.51989	15.8083	No vegetation	Fine sand	Gee et al. (1994)
31.3	34.6	70	Mixed	210	20.989	1452	48	0.725942	31.4336	471.68	0.144628	0	1.47637	27.8606	Cropland	Loam	Hadas et al. (1999)
31.9	34.8	73.7	Mixed	567	20.6594	1311	67	0.791105	31.4336	424.86	0.432494	201.201	1.07206	21.5591	Cropland	ClayFine sand	Hadas et al. (1999)
32.1	34.8	81.6	Mixed	544	20.6613	1290	69	0.630125	0	369.64	0.421705	226.989	0.868274	18.0096	Cropland	Loam	Hadas et al. (1999)
32.3	34.9	95.9	Mixed	588	20.516	1307	68	1.09129	0	378.16	0.449885	0	0.787096	17.2998	Cropland	ClayFine sand	Hadas et al. (1999)
33.71	9.76	84.5	Mixed	91.2	21.1799	1476.18	32	0.88034	32.8007	51.4936	0.122367	9.37886	1.37075	23.4194			Hamza et al. (2007)
-7.21	34.78	22	Mixed	453.5	23.1513	1439.71	103	0.723305	39.2818	851.039	0.400327	112.007	1.43676	34.9134			Houston (1990)
-34.3	141.3	4	Mixed	310	17.7646	1387	68	0.103737	30.1468	188.96	0.223504	1.73303	1.55281	21.9345	Cropland	Clay	Kennett-Smith et al. (1990)
-34.3	141.3	7.5	Mixed	310	17.7646	1387	68	0.103737	30.1468	188.96	0.223504	1.73303	1.55281	21.9345	Cropland	Fine sand	Kennett-Smith et al. (1990)
-34.6	142.8	13.6	Mixed	312	17.6823	1421	65	0.057296	19.767	702.67	0.219564	5.56924	1.5809	25.8726	Cropland	Fine sand	Kennett-Smith et al. (1990)
-34.6	143.6	18	Mixed	322	17.7151	1378	61	0.011216	13.4273	870.22	0.233672	5.92432	1.6468	34.2541	Cropland	Clay	Kennett-Smith et al. (1990)
-33.4	142.6	0.4	Mixed	255	18.7014	1493	55	0.101909	18.6187	178.57	0.170797	1.92088	1.56789	24.1695	Grassland	Fine sand	Kennett-Smith et al. (1990)
-37.6	143.9	3	Mixed	430	13.4583	1108	142	0.765891	14.2621	564.78	0.388087	163.084	1.54003	32.6943	Cropland	Clay	Kennett-Smith et al. (1992)
-35.8	141.4	3.5	Mixed	530	16.1853	1294	93	0.074594	41.5543	237.32	0.409583	32.7081	1.53748	20.6124	Grassland	Clay	Kennett-Smith et al. (1993)
11.8	76.4	75	Mixed	1273	24.8919	1386	76	1.57364	15.8255	580.2	0.91847	924.734	1.40414	37.5412	Woodland	Clay	Maréchal et al. (2009)
-33.4	116.1	0.69	Mixed	1150	16.553	1457	131	0.403198	146.513	662.28	0.789293	284.308	1.48076	20.6441	Woodland	Coarse sand	Peck et al. (1981)
-33.4	116.1	8	Mixed	800	16.553	1457	131	0.403198	146.513	662.28	0.549073	284.308	1.48076	20.6441	Woodland	Coarse sand	Peck et al. (1981)
-33.4	116.1	104	Mixed	1300	16.553	1457	131	0.403198	146.513	662.28	0.892244	284.308	1.48076	20.6441	Woodland	Coarse sand	Peck et al. (1981)
-33.4	116.1	150	Mixed	1150	16.553	1457	131	0.403198	146.513	662.28	0.789293	284.308	1.48076	20.6441	Woodland	Coarse sand	Peck et al. (1981)
52.3	9.8	225	Mixed	655	9.62738	518	180	0.733646	150.992	914.34	1.26448	248.385	1.41622	19.7917	Cropland	Fine sand	Renger et al. (1986)
52.3	9.8	190	Mixed	655	9.62738	518	180	0.733646	150.992	914.34	1.26448	248.385	1.41622	19.7917	Grassland	Fine sand	Renger et al. (1986)
52.3	9.8	110	Mixed	655	9.62738	518	180	0.733646	150.992	914.34	1.26448	248.385	1.41622	19.7917	Woodland	Fine sand	Renger et al. (1986)
-34.4	135.9	40	Mixed	550	16.7957	1408	116	0.268864	0	332.98	0.390625	0	0.154808	1.86562	Cropland	Coarse sand	Richardson and Narayan (1995)
-19.8778	28.2733	17.5	Mixed	701.3	20.7932	1389.93	66	0.370216	114.218	663.057	0.421936	97.2237	1.55452	22.8698			Sibanda et al. (2009)
-35.4	147.6	33.3	Mixed	343	15.0419	1079	104	0.884808	23.3168	506.49	0.317887	206.62	1.55023	29.33	Cropland	Clay	Smith et al. (1998)
-35.4	147.6	97	Mixed	628	15.0419	1079	104	0.884808	23.3168	506.49	0.58202	206.62	1.55023	29.33	Cropland	Clay	Smith et al. (1998)
-31.8	150.6	4.9	Mixed	738	16.573	1226	99	2.17986	17.9985	891.67	0.601958	151.549	1.55439	38.3244	Grassland	Loam	Sun and Cornish (2005)
-35.4	148.8	120	Mixed	1230	11.5851	1020	111	1.98442	36.8917	793.5	1.20588	429.868	1.47488	30.6621	Woodland		Talsma and Gardner (1986)
14.5198	4.54834	12.5	Mixed	340.8	30.3852	2376.87	44	0.275982	188.314	613.657	0.163467	12.7256	1.55241	15.172			Vouillamoz et al., (2008)
37.4	104.9	48	Mixed	191	8.43628	879	66	1.72308	20.3228	313.92	0.217292	2.19803	1.65736	24.8948	No vegetation	Fine sand	Wang et al. (2004)
-43.8	171.8	370	Not sure	650	11.2875	681	114	0.838395	22.1895	265.02	0.954479	0	0.893459	18.5086	Cropland	ClayFine sand	Di and Cameron (2002)
-35.8	150.1	200	Not sure	800	15.353	1163	113	1.02396	0	260.76	0.687876	0	0.60978	11.7979	Woodland	Coarse sand	Hume (1997)
53.1	10.8	230	Not sure	615	9.64092	519	175	0.314807	243.94	902.6	1.18497	243.598	1.38373	17.9898	Cropland	Coarse sand	Renger and Wessolek (1990)
51.4	9.3	232	Not sure	687	8.85888	516	187	1.49318	18.8332	652.52	1.3314	326.694	1.4028	27.6801	Cropland	0	Renger and Wessolek (1990)
-24.4	25.6	9	Not sure	492	21.7686	1357	55	0.823242	130.028	634.56	0.362564	12.0487	1.54097	22.1925	Scrubland	Coarse sand	Sloots and Wijnen (1990)
-31.8	115.9	174	Not sure	830	18.6708	1661	107	0.308016	265.747	323.16	0.499699	170.029	1.24048	14.4404	Scrubland	Coarse sand	Thorpe (1989)
-32.3	18.4	38.7	Not sure	216	18.9608	1398	61	1.49624	197.507	327.96	0.154506	14.732	1.4463	15.97	Scrubland	Coarse sand	Timmerman (1985)
-32.3	18.4	43.5	Not sure	290	18.9608	1398	61	1.49624	197.507	327.96	0.207439	14.732	1.4463	15.97	Scrubland	Coarse sand	Timmerman (1985)
-32.1	18.6	20	Not sure	250	19.2481	1434	57	2.55831	197.507	268.68	0.174338	15.6841	1.58584	18.2899	Scrubland	Coarse sand	Timmerman (1986)
-32.3	18.4	15.7	Not sure	196	18.9608	1398	61	1.49624	197.507	327.96	0.1402	14.732	1.4463	15.97	Scrubland	Coarse sand	Vegter (1995)
-32.1	18.4	23.5	Not sure	196	19.077	1398	58	1.45252	197.507	258.12	0.1402	10.3915	1.43109	16.0804	Scrubland	Coarse sand	Vegter (1995)
-25.7	25.95	56.7	Not sure	730.1	19.6748	1417.73	66	0.950718	113.697	663.09	0.381191	28.2766	1.57022	28.2215			Botha (1993)
-26.85	24.23	12	Not sure	451.1	19.2231	1503.64	60	0.40424	232.948	609	0.294872	17.9407	1.58691	12.3556			Botha and Bredenkamp (1992)
-25.88	25.88	47.8	Not sure	730.1	19.46	1424.33	67	0.644444	113.697	620.516	0.379942	28.2801	1.57004	25.5334			Bredenkamp et al. (1987)
-27.63	23.63	15	Not sure	551.8	18.6116	1515.5	58	0.614317	217.341	545.95	0.283447	18.5136	1.5978	11.9583			Bredenkamp et al. (1992)
-24.2	29.06	13.1	Not sure	634.3	20.1288	1428.48	64	2.4674	68.3419	686.784	0.398315	30.4613	1.55086	29.6506			Bredenkamp et al. (1993)
-33.56	18.4	42.5	Not sure	702.1	17.6924	766.789	89	1.07594	213.4	373.932	0.747122	0	1.38329	12.6677			Kok (1992)
-26.05	27.63	81.1	Not sure	793.6	18.0063	1351.02	80	1.74951	16.6974	817.159	0.471291	49.7211	1.55884	35.6184			Fleisher (1981)
-29.56	26.68	21.3	Not sure	755.3	16.3985	1393.85	78	1.21317	56.0416	492.207	0.413222	33.5615	1.57801	26.0189			Kirchner et al. (1991)
-30.65	24	16.4	Not sure	463.8	17.6872	1557.01	55	1.15097	94.5067	53.1	0.211663	1.32147	1.5004	19.2091			Kirchner et al. (1991)
-25.08	30.75	288	Not sure	993.8	17.642	1150.54	89	5.61327	34.9834	841.32	0.749398	219.773	1.4735	32.8589			Kok (1992)
-25.83	28.13	74.3	Not sure	626	18.7598	1359.42	78	1.74103	87.0644	735.182	0.479266	64.3219	1.55903	33.5844			Kok (1992)
-29.55	30.5	65.4	Not sure	712.6	18.2303	1106.01	129	3.41663	19.8839	429.35	0.821325	187.551	1.43963	36.4747			Kok (1992)
-29.67	26.25	38.1	Not sure	676.5	16.5854	1428.66	73	1.13362	56.0416	366.21	0.371701	27.7915	1.57907	23.4284			Kok (1992)
-30.03	25.8	25.2	Not sure	645.5	16.8206	1459.86	68	1.15997	29.1123	180.828	0.324532	15.7517	1.5614	22.2725			Kok (1992)
-30.55	29.42	55	Not sure	651.5	15.7555	1075.04	124	3.87592	16.8993	1004.97	0.76293	139.542	1.4992	31.5894			Kok (1992)
-32.28	24.62	21.9	Not sure	481.2	17.0244	1476.73	65	4.23523	45.7825	51.6768	0.237902	3.05535	1.59058	21.0922			Kok (1992)
-32.67	26.1	36.2	Not sure	567.3	17.2998	1369.95	85	3.80572	35.2301	513.66	0.401044	16.9481	1.51104	22.4932			Kok (1992)
-32.73	25.95	50.4	Not sure	503.1	17.5975	1391.66	85	3.74167	47.6773	383.355	0.38696	16.8344	1.51298	21.8391			Kok (1992)
-33.75	26.4	53	Not sure	802.7	19.0001	1152.37	97	0.91758	53.903	238.275	0.524057	68.3274	1.10647	14.8779			Kok (1992)
-34.52	20.12	22	Not sure	567.5	17.8129	706.862	105	1.23274	0	554.68	0.728306	0	0.584929	8.43058			Kok (1992)
-26.16	26.75	82.1	Not sure	647.9	18.2747	1394.75	75	0.758954	81.6968	653.385	0.406427	26.9371	1.55888	32.2615			Kok (1992)
-27.72	31	117	Not sure	750.2	18.4415	1188.26	103	3.88543	15.1847	824.86	0.678963	125.43	1.53599	34.6039			Van Wyk (1963)
-26.38	28.92	35	Not sure	733.5	16.6611	1276.83	78	0.903458	14.3512	763.246	0.525499	59.8415	1.63687	42.9486			Vegter (1995)
-29.42	22.08	0.8	Not sure	201.4	20.226	1727.27	34	1.07439	254.072	146.504	0.125859	0	1.54377	11.2886			Vegter (1995)
-33.36	21.3	12.5	Not sure	472.3	16.4208	1377.77	72	5.0455	50.4172	252.232	0.208065	2.51742	1.60847	21.7541			Vegter (1995)
-33.68	19.85	47.7	Not sure	628.3	16.5822	1369.28	78	5.4668	96.6437	415.612	0.319138	53.8434	1.50352	21.875			Vegter (1995)
27.88	110.25	0.135	Not sure	320	16.575	2600	189	3.4812	21.6986	730.34	0.123077	597.12	1.4551	29.7152			Ojeda (2001)
-25.13	24.59	11	Not sure	500	21.3045	1449.48	54	0.192171	213.262	617.91	0.344951	6.9033	1.60867	14.7674			Selaolo et al. (1996)
47.83	-115.59	3.6	Not sure	246	6.4149	990	129	7.29815	74.5315	464	0.248485	375.552	1.11992	11.3685			Flint and Flint (2007)
Abbrevations
WTF	Water table fluctuation method
T	Tracer method/Isotope method
WB	Water balance method
L	Lysimeter
M	Model based
BF	Base flow saperation
P	Precipitation
T	Mean temperature
PET	Potential evapo-transpiration
Rd	No. of rainy days
S	Slope
ksat	Saturated hydraulic conductivity
SWSC	Soil water storage capacity
AI	Aridity index
EW	Excess water (without irrigation)
ρb	Bulk density
Clay	Clay content
LU	Land use land cover
ST	Soil texture
